# Supplementary material for: The Role of Reproductive Hormones in Sex Differences in Sleep Homeostasis and Arousal Response in Mice
Source: Frontiers journal article supplement (doi:10.3389/fnins.2021.739236), 2021-09-21
Supplement: Data_Sheet_1.PDF [file Data_Sheet_1.PDF]

## Supplementary Material

### 1 Supplementary Figures

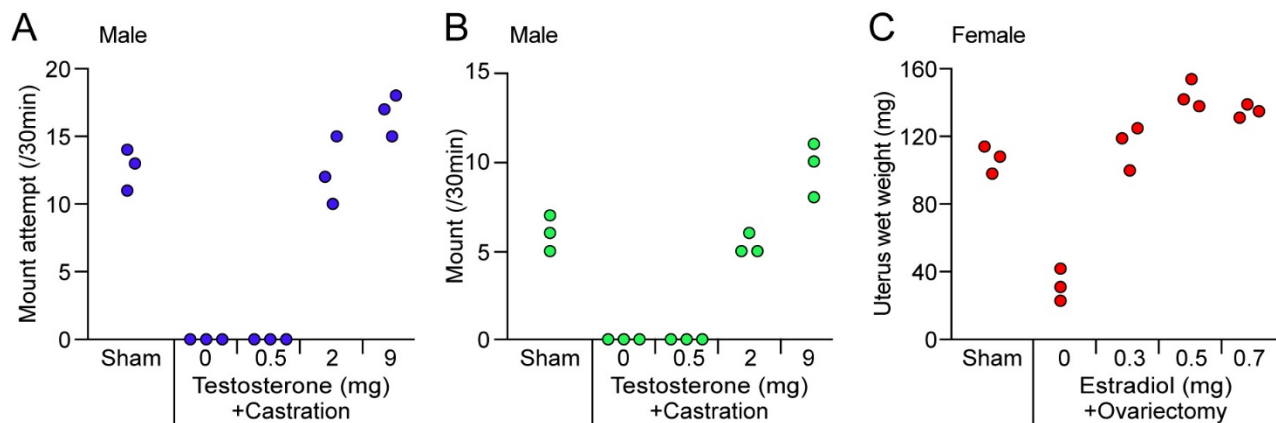

**Supplementary Figure 1.** (A,B) Male sexual behaviors were scored in castrated males with different amount of testosterone supplementation. Mount attempt (A) and Mount (B) for 30min. 3 mice per group. (C) Female uteri were weighed in ovariectomized females with different amount of estradiol supplementation. 3 mice per group.
