# Supplementary material for: The Role of Reproductive Hormones in Sex Differences in Sleep Homeostasis and Arousal Response in Mice
Source: Front Neurosci. 2021 Sep 21;15:739236. doi: 10.3389/fnins.2021.739236 (PMC8491770; doi:10.3389/fnins.2021.739236)
Supplement: Supplementary file 3 [file Table_1.XLSX]

## Sheet: Fig. 1
Statistical summary of Figure 1
A
Intact mice				Intact mice
Two-way ANOVA				Sidak test
Sex	p value	F value			Male			Female
	<0.0001	F (1, 69) = 34.48		Wake	Mean	S.E.M.	SD	Mean	S.E.M	SD	p value	Cohen's d
Time	p value	F value		24hr	768.167	16.0481	53.2256	865.071	18.3711	68.7383	<0.0001	1.57637
	<0.0001	F (2, 69) = 839.8		Light	248.091	5.80701	19.2597	281.067	6.35642	23.7835	0.2415	1.52382
Sex x Time	p value	F value		Dark	520.076	13.3129	44.154	583.99	13.6719	51.1555	0.0039	1.3376
	0.0668	F (2, 69) = 2.815
B
Intact mice				Intact mice
Two-way ANOVA				Sidak test
Sex	p value	F value			Male			Female
	<0.0001	F (1, 69) = 39.61		NREMS	Mean	S.E.M.	SD	Mean	S.E.M	SD	p value	Cohen's d
Time	p value	F value		24hr	595.561	14.9512	49.5876	500.198	16.8948	63.2144	<0.0001	-1.6786
	<0.0001	F (2, 69) = 518.9		Light	411.727	5.19578	17.2324	378.6	6.13495	22.9549	0.176	-1.63218
Sex x Time	p value	F value		Dark	183.833	12.1163	40.1851	121.598	12.3141	46.0752	0.002	-1.43962
	0.0483	F (2, 69) = 3.168
C
Intact mice				Intact mice
Two-way ANOVA
Sex	p value	F value
	0.4889	F (1, 69) = 0.4842
Time	p value	F value		No post-hoc test has done because two-way ANOVA was not significant for either the interation or sex
	<0.0001	F (2, 69) = 611.0
Sex x Time	p value	F value
	0.8503	F (2, 69) = 0.1625
D
Intact mice				Intact mice
Two-way ANOVA
Sex	p value	F value
	0.492	F (1, 22) = 0.4884
Time	p value	F value		No post-hoc test has done because two-way ANOVA was not significant for either the interation or sex
	<0.0001	F (23, 452) = 24.77
Sex x Time	p value	F value
	0.1123	F (23, 452) = 1.383
E
Male mice				Male mice
Two-way ANOVA				Sidak test
Condition	p value	F value			Intact			Gonadectomy			Tesotsterone
	<0.0001	F (2, 111) = 41.49		Wake	Mean	S.E.M.	SD	Mean	S.E.M	SD	Mean	S.E.M	SD
Time	p value	F value		24hr	768.167	16.0481	53.2256	651.708	5.04362	20.1745	702.692	16.3926	59.1043
	<0.0001	F (2, 111) = 1486		Light	248.091	5.80701	19.2597	249.052	5.26024	21.0409	230.423	5.13488	18.5141
Condition x TIME	p value	F value		Dark	520.076	13.3129	44.154	402.656	6.52831	26.1132	472.269	15.4664	55.7647
	<0.0001	F (4, 111) = 11.86
				p value	24hr	light	dark		Cohen's d	24hr	light	dark
				Intact vs. Gonadectomy	<0.0001	0.9999	<0.0001		Intact vs. Gonadectomy	-2.89344	0.0476537	-3.23709
				Intact vs. Testosterone	0.0001	0.5869	0.0075		Intact vs. Testosterone	-1.16416	-0.935273	-0.950512
				Gonadectomy vs. Testosterone	0.0013	0.4657	<0.0001		Gonadectomy vs. Testosterone	1.15451	-0.940013	1.5988
F
Male mice				Male mice
Two-way ANOVA				Sidak test
Condition	p value	F value			Intact			Gonadectomy			Tesotsterone
	<0.0001	F (2, 114) = 40.42		NREMS	Mean	S.E.M.	SD	Mean	S.E.M	SD	Mean	S.E.M	SD
Time	p value	F value		24hr	595.561	14.9512	49.5876	703.635	4.86201	19.4481	656.905	15.48	57.9208
	<0.0001	F (2, 114) = 1405		Light	411.727	5.19578	17.2324	418.521	4.27349	17.094	427.333	4.62808	17.3167
Condition x TIME	p value	F value		Dark	183.833	12.1163	40.1851	285.115	5.63898	22.5559	229.571	13.7419	51.4174
	<0.0001	F (4, 114) = 8.928
				p value	24hr	light	dark		Cohen's d	24hr	light	dark
				Intact vs. Gonadectomy	<0.0001	0.9475	<0.0001		Intact vs. Gonadectomy	2.86944	0.395818	3.10818
				Intact vs. Testosterone	0.0001	0.6219	0.0053		Intact vs. Testosterone	1.13778	0.90341	0.991197
				Gonadectomy vs. Testosterone	0.0014	0.8738	0.0001		Gonadectomy vs. Testosterone	-1.08165	0.512186	-1.399
G
Male mice				Male mice
Two-way ANOVA				Sidak test
Condition	p value	F value			Intact			Gonadectomy			Tesotsterone
	<0.0001	F (2, 114) = 10.69		REMS	Mean	S.E.M.	SD	Mean	S.E.M	SD	Mean	S.E.M	SD
Time	p value	F value		24hr	76.2727	1.94771	6.45982	84.6563	2.08846	8.35386	76.881	1.62976	6.098
	<0.0001	F (2, 114) = 861.9		Light	60.1818	1.51415	5.02187	52.4271	1.88549	7.54197	60.5357	1.53919	5.75912
Condition x TIME	p value	F value		Dark	16.0909	1.50141	4.9796	32.2292	1.30072	5.20287	16.3452	1.41642	5.29976
	<0.0001	F (4, 114) = 18.37
				p value	24hr	light	dark		Cohen's d	24hr	light	dark
				Intact vs. Gonadectomy	0.0027	0.0062	<0.0001		Intact vs. Gonadectomy	1.12272	-1.21034	3.16905
				Intact vs. Testosterone	0.9932	0.9986	0.9995		Intact vs. Testosterone	0.0968278	0.0654989	0.0494594
				Gonadectomy vs. Testosterone	0.003	0.0018	<0.0001		Gonadectomy vs. Testosterone	-1.06315	1.20844	-3.02462
H
Male mice				Male mice
Two-way ANOVA				Sidak test
Condition	p value	F value			Intact			Gonadectomy			Tesotsterone			p value			Cohen's d
	<0.0001	F (2, 795) = 105.0		Delta density	Mean	S.E.M.	SD	Mean	S.E.M	SD	Mean	S.E.M	SD	I-G	I-H	G-H	I-G	I-H	G-H
Time	p value	F value		ZT0	12.8876	0.614245	2.03722	10.6813	0.462068	1.60065	10.6357	0.370264	1.3854	0.0013	0.0007	>0.9999	-1.20428	-1.29262	-0.0304674
	<0.0001	F (23, 795) = 12.20		ZT1	11.834	0.62364	2.06838	10.0385	0.376739	1.30506	10.1066	0.392648	1.46915	0.0107	0.011	>0.9999	-1.03824	-0.962876	0.0490299
Condition x TIME	p value	F value		ZT2	10.8994	0.570665	1.89268	9.59615	0.32102	1.11204	9.81492	0.352603	1.31932	0.0796	0.1446	>0.9999	-0.839571	-0.664738	0.179306
	0.004	F (46, 795) = 1.674		ZT3	10.7467	0.491404	1.6298	9.37227	0.363058	1.25767	9.64628	0.339169	1.26905	0.0616	0.1373	>0.9999	-0.944174	-0.753388	0.216884
				ZT4	10.34	0.565173	1.87447	9.29083	0.388708	1.34652	9.32499	0.333525	1.24794	0.1812	0.18	>0.9999	-0.642907	-0.637467	0.0263163
				ZT5	10.0881	0.441629	1.46472	8.9525	0.352764	1.22201	9.20777	0.328371	1.22865	0.1392	0.2663	>0.9999	-0.841908	-0.651199	0.208327
				ZT6	9.58618	0.391113	1.29718	8.76945	0.333429	1.15503	8.78039	0.253625	0.948978	0.3394	0.3246	>0.9999	-0.665002	-0.709018	0.010347
				ZT7	9.25739	0.365596	1.21255	8.58212	0.344925	1.19485	8.64151	0.256671	0.960375	0.4679	0.5051	>0.9999	-0.560982	-0.563087	0.0547928
				ZT8	9.26724	0.493503	1.63676	8.47832	0.372131	1.2891	8.25115	0.270034	1.01038	0.3628	0.1794	>0.9999	-0.535508	-0.747059	-0.196145
				ZT9	8.8501	0.392345	1.30126	8.18452	0.339263	1.17524	8.12483	0.219949	0.822973	0.4775	0.396	>0.9999	-0.536824	-0.666179	-0.0588368
				ZT10	8.91788	0.572824	1.89984	8.34236	0.432263	1.4974	8.19653	0.483441	1.80887	0.5699	0.3997	>0.9999	-0.336465	-0.388884	-0.0878212
				ZT11	8.91331	0.498434	1.65312	8.0944	0.337228	1.16819	7.65185	0.30866	1.1549	0.3377	0.0786	0.9997	-0.572127	-0.884652	-0.380994
				ZT12	7.7637	0.642244	1.81654	7.47094	0.597053	1.9802	6.41548	0.355682	1.28243	0.8791	0.0929	0.5612	-0.154073	-0.857465	-0.63269
				ZT13	8.43883	0.623874	2.06916	8.4639	0.420428	1.45641	7.30091	0.389095	1.45586	0.9988	0.1212	0.1944	0.0140084	-0.636071	-0.79868
				ZT14	9.36689	0.802597	2.66191	9.05853	0.475322	1.64656	7.54612	0.251346	0.940451	0.8448	0.007	0.018	-0.139325	-0.912085	-1.12797
				ZT15	10.3922	0.929206	2.62819	9.32	0.387235	1.34142	7.86245	0.355595	1.28212	0.2148	0.0006	0.0267	-0.513883	-1.22343	-1.11085
				ZT16	11.7447	1.00261	3.00784	8.94707	0.433326	1.50109	7.65455	0.318511	1.14841	<0.0001	<0.0001	0.1186	-1.17696	-1.7966	-0.967144
				ZT17	11.1339	0.680357	2.15148	9.46785	0.467676	1.62008	7.92284	0.303109	1.09288	0.0228	<0.0001	0.0223	-0.87482	-1.88181	-1.11808
				ZT18	11.8827	0.836226	2.77345	9.4752	0.36851	1.27656	9.09416	0.304235	1.13834	0.0004	<0.0001	>0.9999	-1.11518	-1.31544	-0.315057
				ZT19	11.8749	0.656782	2.1783	9.29764	0.387152	1.34113	8.84351	0.338118	1.26512	0.0001	<0.0001	0.9998	-1.42484	-1.70187	-0.348348
				ZT20	11.4207	0.592089	1.96374	8.79665	0.376388	1.30385	8.69214	0.368449	1.37861	0.0001	<0.0001	>0.9999	-1.57435	-1.60828	-0.0778853
				ZT21	11.1065	0.504096	1.6719	8.72287	0.356927	1.23643	8.47896	0.266986	0.998969	0.0005	<0.0001	>0.9999	-1.62109	-1.90791	-0.216999
				ZT22	11.3798	0.713938	2.25767	8.47483	0.638123	1.91437	8.55723	0.312348	1.1687	<0.0001	<0.0001	>0.9999	-1.38791	-1.57017	0.0519541
				ZT23	11.5449	0.65154	2.06035	9.79686	0.582547	2.018	8.95464	0.360507	1.24883	0.0162	0.0002	0.717	-0.857165	-1.52043	-0.501896
I
Female mice				Female mice
Two-way ANOVA				Sidak test
Condition	p value	F value			Intact			Gonadectomy			Estradiol
	<0.0001	F (2, 108) = 62.10		Wake	Mean	S.E.M.	SD	Mean	S.E.M	SD	Mean	S.E.M	SD
Time	p value	F value		24hr	865.071	18.3711	68.7383	718.257	13.3917	50.1073	870.485	19.641	65.1418
	<0.0001	F (2, 108) = 1378		Light	281.067	6.35642	23.7835	247.179	5.18414	19.3973	262.967	5.35412	17.7576
Condition x TIME	p value	F value		Dark	583.99	13.6719	51.1555	471.071	10.6229	39.7472	607.527	15.1841	50.3601
	<0.0001	F (4, 108) = 9.456
				p value	24hr	light	dark		Cohen's d	24hr	light	dark
				Intact vs. Gonadectomy	<0.0001	0.4023	<0.0001		Intact vs. Gonadectomy	-2.44086	-1.56156	-2.46506
				Intact vs. Estradiol	>0.9999	0.9744	0.8802		Intact vs. Estradiol	0.0808405	-0.862399	0.463694
				Gonadectomy vs. Estradiol	<0.0001	0.9899	<0.0001		Gonadectomy vs. Estradiol	2.61952	0.849027	3.00795
J
Female mice				Female mice
Two-way ANOVA				Sidak test
Condition	p value	F value			Intact			Gonadectomy			Estradiol
	<0.0001	F (2, 108) = 70.95		NREMS	Mean	S.E.M.	SD	Mean	S.E.M	SD	Mean	S.E.M	SD
Time	p value	F value		24hr	500.198	16.8948	63.2144	644.443	12.8793	48.19	487.173	19.638	65.1318
	<0.0001	F (2, 108) = 803.0		Light	378.6	6.13495	22.9549	418.905	4.58654	17.1613	387.158	6.69485	22.2043
Condition x TIME	p value	F value		Dark	121.598	12.3141	46.0752	225.538	9.67119	36.1863	100.015	13.8536	45.9472
	<0.0001	F (4, 108) = 8.281
				p value	24hr	light	dark		Cohen's d	24hr	light	dark
				Intact vs. Gonadectomy	<0.0001	0.0479	<0.0001		Intact vs. Gonadectomy	2.56634	1.98877	2.50901
				Intact vs. Estradiol	0.8431	0.9484	0.5301		Intact vs. Estradiol	-0.202942	0.378944	-0.46907
				Gonadectomy vs. Estradiol	<0.0001	0.2058	<0.0001		Gonadectomy vs. Estradiol	-2.74513	-1.59987	-3.0352
K
Female mice				Female mice
Two-way ANOVA				Sidak test
Condition	p value	F value			Intact			Gonadectomy			Estradiol
	0.0042	F (2, 108) = 5.747		REMS	Mean	S.E.M.	SD	Mean	S.E.M	SD	Mean	S.E.M	SD
Time	p value	F value		24hr	74.7381	2.34568	8.77673	77.6205	1.93502	6.80032	82.3606	2.09102	6.93513
	<0.0001	F (2, 108) = 919.8		Light	60.3405	1.51542	5.67018	54.0641	1.84835	6.42658	69.903	2.13888	7.09385
Condition x TIME	p value	F value		Dark	14.4119	1.47179	5.50693	23.5564	1.49823	5.22392	12.4667	1.53626	5.0952
	<0.0001	F (4, 108) = 13.94
				p value	24hr	light	dark		Cohen's d	24hr	light	dark
				Intact vs. Gonadectomy	0.6511	0.03	0.0012		Intact vs. Gonadectomy	0.367142	-1.03567	1.70375
				Intact vs. Estradiol	0.0129	0.0012	0.8413		Intact vs. Estradiol	0.963691	1.48912	-0.366676
				Gonadectomy vs. Estradiol	0.1595	<0.0001	0.0002		Gonadectomy vs. Estradiol	0.690165	2.34011	-2.14919
L
Female mice				Female mice
Two-way ANOVA				Sidak test
Condition	p value	F value			Intact			Gonadectomy			Estradiol			p value			Cohen's d
	0.0075	F (2, 656) = 4.928		Delta density	Mean	S.E.M.	SD	Mean	S.E.M	SD	Mean	S.E.M	SD	I-G	I-H	G-H	I-G	I-H	G-H
Time	p value	F value		ZT0	13.1129	0.605562	2.26581	12.8438	0.914204	2.74261	14.0096	0.998282	3.31093	0.9611	0.6124	>0.9999	-0.106954	0.3161	0.383474
	<0.0001	F (23, 656) = 7.539		ZT1	12.4801	0.552785	2.06833	11.5876	0.822947	2.46884	12.9049	0.908421	3.01289	0.6489	0.8949	>0.9999	-0.391864	0.16442	0.478271
Condition x TIME	p value	F value		ZT2	11.7444	0.549016	2.05423	10.9552	0.715624	2.14687	12.1944	0.826258	2.74039	0.7125	0.8829	>0.9999	-0.375628	0.18581	0.503415
	0.4923	F (46, 656) = 0.9907		ZT3	11.5582	0.572554	2.1423	10.8332	0.75815	2.27445	11.4217	0.796067	2.64026	0.7509	0.9886	>0.9999	-0.328159	-0.0567635	0.238845
				ZT4	11.0227	0.560355	2.09666	10.3923	0.683633	2.0509	10.9184	0.663895	2.20189	0.805	0.9933	>0.9999	-0.303966	-0.0485308	0.247239
				ZT5	10.4257	0.511811	1.91502	10.2915	0.754987	2.26496	10.2626	0.714814	2.37077	0.9902	0.9837	>0.9999	-0.0639441	-0.0756619	-0.0124822
				ZT6	10.1519	0.534992	2.00176	10.111	0.838881	2.51664	9.67328	0.704558	2.33675	0.9991	0.8686	>0.9999	-0.0179921	-0.219993	-0.180257
				ZT7	9.84508	0.536971	2.00916	9.82842	0.755069	2.26521	9.23613	0.59709	1.98032	0.9998	0.7965	>0.9999	-0.00778093	-0.305266	-0.278389
				ZT8	9.44123	0.466898	1.74697	9.44688	0.738011	2.21403	8.95753	0.567521	1.88225	>0.9999	0.866	>0.9999	0.00283152	-0.266377	-0.238145
				ZT9	9.55535	0.517309	1.93559	9.182	0.628079	1.88424	8.91607	0.574019	1.90381	0.9265	0.7783	>0.9999	-0.195466	-0.332998	-0.140399
				ZT10	9.76213	0.56509	2.11437	8.8211	0.599506	1.79852	9.16076	0.687774	2.28109	0.6186	0.801	>0.9999	-0.479429	-0.273435	0.165362
				ZT11	9.59768	0.548214	2.05123	8.8274	0.598367	1.7951	8.64714	0.598374	1.98458	0.724	0.5769	0.9997	-0.399642	-0.470992	-0.0952676
				ZT12	8.96085	1.13407	3.40222	7.9808	1.04102	2.75428	6.64912	0.782369	1.74943	0.687	0.1909	0.5612	-0.316628	-0.854565	-0.577177
				ZT13	9.13074	0.881722	2.64517	9.63075	0.827075	2.48123	7.98569	0.470918	1.41275	0.8937	0.5584	0.1944	0.19497	-0.539999	-0.814804
				ZT14	8.77079	0.637817	2.01695	9.92367	0.808927	2.42678	9.62333	1.16992	3.50977	0.5373	0.7104	0.018	0.516686	0.297843	-0.0995387
				ZT15	9.16034	1.41222	3.15782	10.6498	0.813027	2.43908	8.2221	1.43729	4.06527	0.4955	0.7637	0.0267	0.527902	-0.257762	-0.724187
				ZT16	8.81467	1.96783	3.93565	10.0752	1.04442	3.13327	8.89466	1.34338	3.55425	0.6466	0.9984	0.1186	0.354367	0.021333	-0.352362
				ZT17	10.2755	1.28992	3.86975	10.5997	1.00935	3.02806	7.18856	0.987025	2.61142	0.9538	0.0304	0.0223	0.0933051	-0.935124	-1.20644
				ZT18	12.4872	0.855054	2.83589	10.3391	0.794826	2.38448	9.77112	1.13084	2.99191	0.1133	0.0516	>0.9999	-0.819919	-0.931781	-0.209945
				ZT19	12.2301	0.791489	2.96148	10.5475	0.877837	2.63351	9.40451	1.04657	3.1397	0.2231	0.0177	0.9998	-0.600425	-0.925838	-0.39445
				ZT20	11.9865	0.518132	1.86815	10.2136	0.880158	2.64047	12.1604	0.856392	2.70815	0.1993	0.983	>0.9999	-0.77519	0.0747373	0.72792
				ZT21	11.6714	0.655788	2.45373	9.71381	0.715445	2.14633	12.0511	1.33858	4.01575	0.1342	0.9241	>0.9999	-0.849209	0.114109	0.725932
				ZT22	11.132	0.84483	2.80198	8.60444	0.903904	2.39151	9.86397	0.961424	2.71932	0.0754	0.4805	>0.9999	-0.970344	-0.459281	0.491879
				ZT23	12.6243	0.834465	2.89067	10.8287	1.57515	3.8583	11.9103	0.944684	2.98735	0.2853	0.7583	0.717	-0.526713	-0.242916	0.31345
M
Gonadectomized mice				Gonadectomized mice
Two-way ANOVA				Sidak test
Sex	p value	F value			Male			Female
	<0.0001	F (1, 84) = 45.69		Wake	Mean	S.E.M.	SD	Mean	S.E.M	SD	p value	Cohen's d
Time	p value	F value		24hr	651.708	5.04362	20.1745	718.257	13.3917	50.1073	<0.0001	1.74233
	<0.0001	F (2, 84) = 1486		Light	249.052	5.26024	21.0409	247.179	5.18414	19.3973	0.9978	-0.0925841
Sex x Time	p value	F value		Dark	402.656	6.52831	26.1132	471.071	10.6229	39.7472	<0.0001	2.03445
	<0.0001	F (2, 84) = 12.42
N
Gonadectomized mice				Gonadectomized mice
Two-way ANOVA				Sidak test
Sex	p value	F value			Male			Female
	<0.0001	F (1, 84) = 42.63		NREMS	Mean	S.E.M.	SD	Mean	S.E.M	SD	p value	Cohen's d
Time	p value	F value		24hr	703.635	4.86201	19.4481	644.443	12.8793	48.19	<0.0001	-1.61087
	<0.0001	F (2, 84) = 1626		Light	418.521	4.27349	17.094	418.905	4.58654	17.1613	>0.9999	0.0224157
Sex x Time	p value	F value		Dark	285.115	5.63898	22.5559	225.538	9.67119	36.1863	<0.0001	-1.97591
	<0.0001	F (2, 84) = 10.87
O
Gonadectomized mice				Gonadectomized mice
Two-way ANOVA				Sidak test
Sex	p value	F value			Male			Female
	0.0009	F (1, 84) = 11.87		REMS	Mean	S.E.M.	SD	Mean	S.E.M	SD	p value	Cohen's d
Time	p value	F value		24hr	84.6563	2.08846	8.35386	77.3143	1.81746	6.80032	0.0212	-0.963917
	<0.0001	F (2, 84) = 467.1		Light	52.4271	1.88549	7.54197	53.9167	1.71758	6.42658	0.8911	0.2126
Sex x Time	p value	F value		Dark	32.2292	1.30072	5.20287	23.3976	1.39615	5.22392	0.0031	-1.69401
	0.0078	F (2, 84) = 5.138
P
Gonadectomized mice				Gonadectomized mice
Two-way ANOVA
Sex	p value	F value
	0.2002	F (1, 28) = 1.721
Time	p value	F value		No post-hoc test has done because two-way ANOVA was not significant for either the interation or sex
	<0.0001	F (23, 628) = 22.79
Sex x Time	p value	F value
	0.2917	F (23, 628) = 1.144
Q
Hormone-supplemented male mice				Hormone-supplemented male mice
Two-way ANOVA				Sidak test
Sex	p value	F value			Male			Female
	<0.0001	F (1, 66) = 95.68		Wake	Mean	S.E.M.	SD	Mean	S.E.M	SD	p value	Cohen's d
Time	p value	F value		24hr	702.692	59.1043	59.1043	870.485	65.1418	65.1418	<0.0001	2.69779
	<0.0001	F (2, 66) = 744.7		Light	230.423	18.5141	18.5141	262.967	17.7576	17.7576	0.2415	1.79404
Sex x Time	p value	F value		Dark	472.269	55.7647	55.7647	607.527	50.3601	50.3601	0.0039	2.54574
	<0.0001	F (2, 66) = 12.70
R
Hormone-supplemented male mice				Hormone-supplemented male mice
Two-way ANOVA				Sidak test
Sex	p value	F value			Male			Female
	<0.0001	F (1, 69) = 108.6		NREMS	Mean	S.E.M.	SD	Mean	S.E.M	SD	p value	Cohen's d
Time	p value	F value		24hr	656.905	57.9208	57.9208	487.173	65.1318	65.1318	<0.0001	-2.75397
	<0.0001	F (2, 69) = 474.6		Light	427.333	17.3167	17.3167	387.158	22.2043	22.2043	0.1048	-2.01776
Sex x Time	p value	F value		Dark	229.571	51.4174	51.4174	100.015	45.9472	45.9472	<0.0001	-2.65707
	<0.0001	F (2, 69) = 12.43
S
Hormone-supplemented male mice				Hormone-supplemented male mice
Two-way ANOVA				Sidak test
Sex	p value	F value			Male			Female
	0.0114	F (1, 69) = 6.754		REMS	Mean	S.E.M.	SD	Mean	S.E.M	SD	p value	Cohen's d
Time	p value	F value		24hr	76.881	6.098	6.098	82.3606	6.93513	6.93513	0.0809	0.839152
	<0.0001	F (2, 69) = 790.8		Light	60.5357	5.75912	5.75912	69.903	7.09385	7.09385	0.0008	1.44981
Sex x Time	p value	F value		Dark	16.3452	5.29976	5.29976	12.4667	5.0952	5.0952	0.3092	-0.746096
	0.0009	F (2, 69) = 7.808
T
Hormone-supplemented male mice				Hormone-supplemented male mice
Two-way ANOVA				Sidak test
Sex	p value	F value			Male			Female
	0.0105	F (1, 22) = 7.827		Delta density	Mean	S.E.M.	SD	Mean	S.E.M	SD	p value	Cohen's d
Time	p value	F value		ZT0	10.6357	0.370264	1.3854	14.5589	0.92158	2.91429	<0.0001	1.71938
	<0.0001	F (23, 467) = 27.40		ZT1	10.1066	0.392648	1.46915	13.2925	0.908334	2.8724	0.0024	1.39647
Sex x Time	p value	F value		ZT2	9.81492	0.352603	1.31932	12.579	0.808468	2.5566	0.017	1.35874
	<0.0001	F (23, 467) = 4.816		ZT3	9.64628	0.339169	1.26905	11.7224	0.814909	2.57697	0.23	1.02212
				ZT4	9.32499	0.333525	1.24794	11.2124	0.658047	2.08093	0.391	1.10006
				ZT5	9.20777	0.328371	1.22865	10.5212	0.736755	2.32982	0.9325	0.705177
				ZT6	8.78039	0.253625	0.948978	9.97672	0.702977	2.22301	0.974	0.699958
				ZT7	8.64151	0.256671	0.960375	9.49364	0.595566	1.88334	0.9998	0.570032
				ZT8	8.25115	0.270034	1.01038	9.18774	0.573478	1.8135	0.999	0.638037
				ZT9	8.12483	0.219949	0.822973	9.14915	0.579933	1.83391	0.9962	0.720669
				ZT10	8.19653	0.483441	1.80887	9.39459	0.715072	2.26126	0.9736	0.585103
				ZT11	7.65185	0.30866	1.1549	8.87612	0.611174	1.9327	0.9666	0.768997
				ZT12	6.41548	0.355682	1.28243	6.87495	0.967044	1.93409	0.9992	0.28
				ZT13	7.30091	0.389095	1.45586	8.13487	0.506472	1.43252	0.9994	0.577437
				ZT14	7.54612	0.251346	0.940451	9.99942	1.25616	3.55296	0.0546	0.943999
				ZT15	7.86245	0.355595	1.28212	8.2842	1.65809	4.3869	>0.9999	0.1305
				ZT16	7.65455	0.318511	1.14841	9.60477	1.34929	3.30506	0.7525	0.788259
				ZT17	7.92284	0.303109	1.09288	7.31078	1.15888	2.83865	>0.9999	-0.284565
				ZT18	9.09416	0.304235	1.13834	10.0935	1.28249	3.14144	0.6301	0.42299
				ZT19	8.84351	0.338118	1.26512	9.51149	1.18048	3.3389	0.9997	0.264575
				ZT20	8.69214	0.368449	1.37861	12.5117	0.873211	2.61963	0.0001	1.82474
				ZT21	8.47896	0.266986	0.998969	12.0511	1.33858	4.01575	0.0001	1.22078
				ZT22	8.55723	0.312348	1.1687	10.4155	0.909324	2.40585	0.0119	0.982541
				ZT23	8.95464	0.360507	1.24883	12.2197	0.997908	2.99372	0.015	1.42352

## Sheet: Fig. 2
Statistical summary of Figure 2
A
Intact mice				Intact mice
Two-way ANOVA				Sidak or Mann Whitney U test (for dark)
Sex	p value	F value			Male			Female
	0.0004	F (1, 69) = 13.94		Wake ED	Mean	S.E.M.	SD	Mean	S.E.M	SD	p value	Cohen's d
Time	p value	F value		24hr	4.84105	0.225485	0.74785	6.77425	0.624222	2.33562	0.0021	1.1148
	<0.0001	F (2, 69) = 38.08		Light	2.3045	0.108678	0.360443	2.78357	0.217734	0.814686	0.6282	0.760511
Sex x Time	p value	F value		Dark	10.4169	0.858204	2.84634	24.3522	3.74157	13.9997	0.0062	1.37949
	0.0005	F (2, 69) = 8.537
B
Intact mice				Intact mice
Two-way ANOVA
Sex	p value	F value
	0.4404	F (1, 69) = 0.6022
Time	p value	F value		No post-hoc test has done because two-way ANOVA was not significant for either the interation or sex
	0.8597	F (2, 69) = 0.1515
Sex x Time	p value	F value
	0.2513	F (2, 69) = 1.409
C
Intact mice				Intact mice
Two-way ANOVA				Sidak test
Sex	p value	F value			Male			Female
	<0.0001	F (1, 69) = 65.15		REMS ED	Mean	S.E.M.	SD	Mean	S.E.M	SD	p value	Cohen's d
Time	p value	F value		24hr	1.2955	0.0193435	0.0641553	1.50311	0.0242034	0.0905607	0.0009	2.64547
	0.0064	F (2, 69) = 5.435		Light	1.36214	0.0313997	0.104141	1.50818	0.0340486	0.127398	0.0266	1.25517
Sex x Time	p value	F value		Dark	1.10936	0.0410106	0.136017	1.51482	0.057457	0.214984	<0.0001	2.25395
	0.0033	F (2, 69) = 6.232
D
Male mice				Male mice
Two-way ANOVA				Sidak or Kruskal Wallis test
Condition	p value	F value			Intact			Gonadectomy			Testosterone
	<0.0001	F (2, 114) = 13.21		Wake ED	Mean	S.E.M.	SD	Mean	S.E.M	SD	Mean	S.E.M	SD
Time	p value	F value		24hr	4.84105	0.225485	0.74785	3.524	0.119701	0.478802	4.47961	0.321274	1.2021
	<0.0001	F (2, 114) = 114.2		Light	2.3045	0.108678	0.360443	2.15766	0.0488735	0.195494	2.32793	0.108822	0.407175
Condition x TIME	p value	F value		Dark	10.4169	0.858204	2.84634	5.80272	0.32034	1.28136	8.65089	1.14489	4.28378
	0.0004	F (4, 114) = 5.566
				p value	24hr	light	dark		Cohen's d	24hr	light	dark
				Intact vs. Gonadectomy	<0.0001	0.8316	<0.0001		Intact vs. Gonadectomy	-2.09752	-0.506452	-2.09051
				Intact vs. Testosterone	0.3534	0.9956	0.1302		Intact vs. Testosterone	-0.361049	0.0609294	-0.485598
				Gonadectomy vs. Testosterone	0.0004	0.7532	0.0369		Gonadectomy vs. Testosterone	1.04443	0.533131	0.900838
E
Male mice				Male mice
Two-way ANOVA				Sidak test
Condition	p value	F value			Intact			Gonadectomy			Testosterone
	0.0394	F (2, 114) = 3.329		NREMS ED	Mean	S.E.M.	SD	Mean	S.E.M	SD	Mean	S.E.M	SD
Time	p value	F value		24hr	3.73914	0.122243	0.405435	3.79856	0.136665	0.546659	4.06111	0.129944	0.486205
	0.5179	F (2, 114) = 0.6617		Light	3.83886	0.142904	0.47396	3.66491	0.149329	0.597316	4.285	0.132316	0.495082
Condition x TIME	p value	F value		Dark	3.59659	0.167698	0.556191	4.04347	0.133616	0.534465	3.74457	0.147553	0.552093
	0.0197	F (4, 114) = 3.055
				p value	24hr	light	dark		Cohen's d	24hr	light	dark
				Intact vs. Gonadectomy	0.9549	0.6745	0.0796		Intact vs. Gonadectomy	0.123481	-0.322635	0.819303
				Intact vs. Testosterone	0.2833	0.0918	0.7636		Intact vs. Testosterone	0.719253	0.92056	0.267043
				Gonadectomy vs. Testosterone	0.3608	0.0045	0.2681		Gonadectomy vs. Testosterone	0.507513	1.13035	-0.5501
F
Male mice				Male mice
Two-way ANOVA				Sidak test
Condition	p value	F value			Intact			Gonadectomy			Testosterone
	<0.0001	F (2, 114) = 19.95		REMS ED	Mean	S.E.M.	SD	Mean	S.E.M	SD	Mean	S.E.M	SD
Time	p value	F value		24hr	1.2955	0.0193435	0.0641553	1.16469	0.0189406	0.0757625	1.38511	0.0292493	0.109441
	<0.0001	F (2, 114) = 32.63		Light	1.36214	0.0313997	0.104141	1.14159	0.0243028	0.0972111	1.49325	0.0389366	0.145688
Condition x TIME	p value	F value		Dark	1.10936	0.0410106	0.136017	1.21375	0.0317864	0.127145	1.08875	0.0328275	0.122829
	<0.0001	F (4, 114) = 18.90
				p value	24hr	light	dark		Cohen's d	24hr	light	dark
				Intact vs. Gonadectomy	0.0106	<0.0001	0.0562		Intact vs. Gonadectomy	-1.86345	-2.18932	0.792872
				Intact vs. Testosterone	0.1418	0.0133	0.9568		Intact vs. Testosterone	0.998934	1.03541	-0.159067
				Gonadectomy vs. Testosterone	<0.0001	<0.0001	0.0086		Gonadectomy vs. Testosterone	2.34189	2.8395	-0.999952
G
Female mice				Female mice
Two-way ANOVA				Sidak or Kruskal Wallis test
Condition	p value	F value			Intact			Gonadectomy			Estradiol
	<0.0001	F (2, 108) = 10.98		Wake ED	Mean	S.E.M.	SD	Mean	S.E.M	SD	Mean	S.E.M	SD
Time	p value	F value		24hr	6.77425	0.624222	2.33562	4.16146	0.194265	0.726873	7.67082	0.785364	2.60476
	<0.0001	F (2, 108) = 47.54		Light	2.78357	0.217734	0.814686	2.21211	0.0847977	0.317284	2.94332	0.22163	0.735064
Condition x TIME	p value	F value		Dark	24.3522	3.74157	13.9997	7.98771	0.681181	2.54875	31.4547	7.23118	23.9831
	<0.0001	F (4, 108) = 6.545
				p value	24hr	light	dark		Cohen's d	24hr	light	dark
				Intact vs. Gonadectomy	<0.0001	0.897	0.0003		Intact vs. Gonadectomy	-1.51057	-0.924376	-1.62637
				Intact vs. Estradiol	0.5984	>0.9999	>0.9999		Intact vs. Estradiol	0.362418	0.205886	0.361702
				Gonadectomy vs. Estradiol	<0.0001	0.7896	<0.0001		Gonadectomy vs. Estradiol	1.83523	1.29161	1.37603
H
Female mice
Two-way ANOVA				Female mice
Condition	p value	F value
	0.241	F (2, 108) = 1.442
Time	p value	F value
	0.8324	F (2, 108) = 0.1837		No post-hoc test has done because two-way ANOVA was not significant for either the interation or sex
Condition x TIME	p value	F value
	0.1179	F (4, 108) = 1.887
I
Female mice				Female mice
Two-way ANOVA				Sidak test
Condition	p value	F value			Intact			Gonadectomy			Estradiol
	<0.0001	F (2, 108) = 18.91		REMS ED	Mean	S.E.M.	SD	Mean	S.E.M	SD	Mean	S.E.M	SD
Time	p value	F value		24hr	1.50311	0.0242034	0.0905607	1.22579	0.052004	0.194581	1.50991	0.0711438	0.235957
	0.24	F (2, 108) = 1.446		Light	1.50818	0.0340486	0.127398	1.22096	0.0593411	0.222034	1.55477	0.0700847	0.232445
Condition x TIME	p value	F value		Dark	1.51482	0.057457	0.214984	1.24286	0.0544463	0.203719	1.28809	0.113779	0.377363
	0.1147	F (4, 108) = 1.905
				p value	24hr	light	dark		Cohen's d	24hr	light	dark
				Intact vs. Gonadectomy	0.0031	0.0021	0.0038		Intact vs. Gonadectomy	-1.82735	-1.58673	-1.29861
				Intact vs. Estradiol	0.9998	0.9341	0.0327		Intact vs. Estradiol	0.0380606	0.248593	-0.738295
				Gonadectomy vs. Estradiol	0.0047	0.0007	0.9393		Gonadectomy vs. Estradiol	1.3138	1.46859	0.14917
J
Gonadectomized mice				Gonadectomized mice
Two-way ANOVA				Sidak test
Sex	p value	F value			Male			Female
	0.0003	F (1, 84) = 14.27		Wake ED	Mean	S.E.M.	SD	Mean	S.E.M	SD	p value	Cohen's d
Time	p value	F value		24hr	3.524	0.119701	0.478802	4.16146	0.194265	0.726873	0.3877	1.03574
	<0.0001	F (2, 84) = 118.1		Light	2.15766	0.0488735	0.195494	2.21211	0.0847977	0.317284	0.9991	0.206628
Sex x Time	p value	F value		Dark	5.80272	0.32034	1.28136	7.98771	0.681181	2.54875	<0.0001	1.0832
	0.0029	F (2, 84) = 6.270
K
Gonadectomized mice				Gonadectomized mice
Two-way ANOVA
Sex	p value	F value
	0.3885	F (1, 84) = 0.7514
Time	p value	F value		No post-hoc test has done because two-way ANOVA was not significant for either the interation or sex
	0.4857	F (2, 84) = 0.7285
Sex x Time	p value	F value
	0.354	F (2, 84) = 1.051
L
Gonadectomized mice				Gonadectomized mice
Two-way ANOVA
Sex	p value	F value
	0.0977	F (1, 84) = 2.805
Time	p value	F value		No post-hoc test has done because two-way ANOVA was not significant for either the interation or sex
	0.508	F (2, 84) = 0.6828
Sex x Time	p value	F value
	0.8278	F (2, 84) = 0.1894
M
Hormone-supplemented male mice				Hormone-supplemented male mice
Two-way ANOVA				Sidak or Mann Whitney U test
Sex	p value	F value			Male			Female
	0.0001	F (1, 69) = 16.49		Wake ED	Mean	S.E.M.	SD	Mean	S.E.M	SD	p value	Cohen's d
Time	p value	F value		24hr	4.47961	1.2021	1.2021	7.67082	2.60476	2.60476	<0.0001	1.57317
	<0.0001	F (2, 69) = 23.78		Light	2.32793	0.407175	0.407175	2.94332	0.735064	0.735064	0.4979	1.03569
Sex x Time	p value	F value		Dark	8.65089	4.28378	4.28378	31.4547	23.9831	23.9831	<0.0001	1.32373
	0.0001	F (2, 69) = 10.29
N
Hormone-supplemented male mice				Hormone-supplemented male mice
Two-way ANOVA
Sex	p value	F value
	0.953	F (1, 69) = 0.003496
Time	p value	F value		No post-hoc test has done because two-way ANOVA was not significant for either the interation or sex
	0.0041	F (2, 69) = 5.949
Sex x Time	p value	F value
	0.8798	F (2, 69) = 0.1283
O
Hormone-supplemented male mice				Hormone-supplemented male mice
Two-way ANOVA				Sidak test
Sex	p value	F value			Male			Female
	0.0118	F (1, 69) = 6.692		REMS ED	Mean	S.E.M.	SD	Mean	S.E.M	SD	p value	Cohen's d
Time	p value	F value		24hr	1.38511	0.109441	0.109441	1.50991	0.235957	0.235957	0.3893	0.678567
	<0.0001	F (2, 69) = 16.70		Light	1.49325	0.145688	0.145688	1.55477	0.232445	0.232445	0.8571	0.317162
Sex x Time	p value	F value		Dark	1.08875	0.122829	0.122829	1.28809	0.377363	0.377363	0.069	0.710371
	0.5292	F (2, 69) = 0.6424

## Sheet: Fig. 3
Statistical summary of Figure 3
A
Intact male mice				Intact male mice
Two-way ANOVA				Sidak test
Condition	p value	F value			Baseline			Gentle handling
	0.0063	F (1, 10) = 11.89		Wake	Mean	S.E.M.	SD	Mean	S.E.M	SD	p value	Cohen's d
Time	p value	F value		ZT6~11	131.861	4.3558	10.6695	100	3.73274	9.1433	0.0008	-3.20672
	<0.0001	F (2, 20) = 279.7		ZT12~17	293.139	9.9256	24.3126	236.167	16.2838	39.8869	0.0495	-1.72482
Condition x Time	p value	F value		ZT18~23	228.3	5.73922	14.0582	209.117	7.97326	19.5304	0.2272	-1.12739
	0.025	F (2, 20) = 4.460
B
Intact male mice				Intact male mice
Two-way ANOVA				Sidak test
Condition	p value	F value			Baseline			Gentle handling
	0.0135	F (1, 10) = 8.964		NREMS	Mean	S.E.M.	SD	Mean	S.E.M	SD	p value	Cohen's d
Time	p value	F value		ZT6~11	198.944	4.0926	10.0248	220.333	3.3032	8.09115	0.0074	2.348
	<0.0001	F (2, 20) = 239.8		ZT12~17	62.75	9.07262	22.2233	111.167	13.9318	34.1257	0.0533	1.68136
Condition x Time	p value	F value		ZT18~23	119.028	5.02925	12.3191	132.167	7.5991	18.6139	0.4576	0.832444
	0.0153	F (2, 20) = 5.188
C
Intact male mice				Intact male mice
Two-way ANOVA				Sidak test
Condition	p value	F value			Baseline			Gentle handling
	0.0001	F (1, 10) = 36.63		REMS	Mean	S.E.M.	SD	Mean	S.E.M	SD	p value	Cohen's d
Time	p value	F value		ZT6~11	29.1944	0.98828	2.42078	39.6667	1.74483	4.27395	0.0025	3.01511
	<0.0001	F (2, 20) = 252.5		ZT12~17	4.11111	0.959038	2.34915	12.8333	2.31541	5.67157	0.0329	2.00936
Condition x Time	p value	F value		ZT18~23	12.6667	1.01835	2.49444	18.7222	0.388889	0.952579	0.0034	3.20727
	0.2012	F (2, 20) = 1.739
D
Intact male mice				Intact male mice
Two-way ANOVA				Sidak test
Condition	p value	F value			Baseline			Gentle handling
	0.044	F (1, 85) = 4.182		Delta density	Mean	S.E.M.	SD	Mean	S.E.M	SD
Time	p value	F value		ZT0	12.2957	0.487795	1.19485
	<0.0001	F (17, 90) = 3.491		ZT1	11.3536	0.460449	1.12786
Condition x Time	p value	F value		ZT2	10.6566	0.582165	1.42601
	<0.0001	F (17, 85) = 7.445		ZT3	10.2184	0.484612	1.18705
				ZT4	9.73793	0.476565	1.16734
				ZT5	9.84924	0.410126	1.0046				p value	Cohen's d
				ZT6	9.4262	0.422199	1.03417	12.7504	0.343378	0.841101	<0.0001	3.52661
				ZT7	8.91077	0.281156	0.688689	11.8519	0.380044	0.930914	<0.0001	3.59199
				ZT8	8.67643	0.413324	1.01243	11.1351	0.390488	0.956495	0.0003	2.4965
				ZT9	8.48318	0.249546	0.61126	10.2567	0.320099	0.784079	0.0267	2.52275
				ZT10	8.47751	0.461051	1.12934	9.46321	0.334035	0.818216	0.7383	0.999568
				ZT11	8.53452	0.36139	0.885221	8.85526	0.54574	1.33678	>0.9999	0.282912
				ZT12	7.94113	1.04617	2.3393	8.40861	0.414399	1.01507	>0.9999	0.259253
				ZT13	8.37857	0.759608	1.86065	8.61162	0.478246	1.17146	>0.9999	0.149899
				ZT14	8.58179	0.649013	1.58975	9.07509	0.425099	1.04128	0.9997	0.367097
				ZT15	10.1283	0.974314	1.94863	8.66911	0.370458	0.907432	0.4636	-0.960031
				ZT16	11.924	1.12782	2.76257	10.8608	1.04199	2.55236	0.6212	-0.399755
				ZT17	10.9605	0.552199	1.3526	11.1838	0.767397	1.87973	>0.9999	0.13639
				ZT18	10.8749	0.871619	2.13502	9.38713	0.927919	2.27293	0.1226	-0.674704
				ZT19	11.1315	0.734458	1.79905	9.98068	0.628137	1.53861	0.4849	-0.687483
				ZT20	11.2106	0.784541	1.92172	10.3362	0.539437	1.32134	0.876	-0.530233
				ZT21	10.6811	0.412347	1.01004	10.024	0.441324	1.08102	0.9904	-0.628097
				ZT22	11.1598	0.440599	1.07924	10.5752	0.737502	1.8065	0.9975	-0.392917
				ZT23	11.5997	0.606672	1.48604	10.8102	0.456265	0.912529	0.874	-0.640242
E
Gonadectomized male mice				Gonadectomized male mice
Two-way ANOVA				Sidak test
Condition	p value	F value			Baseline			Gentle handling
	0.0071	F (1, 16) = 9.500		Wake	Mean	S.E.M.	SD	Mean	S.E.M	SD	p value	Cohen's d
Time	p value	F value		ZT6~11	129.796	4.81236	14.4371	115.259	4.70742	14.1223	0.1327	-1.01796
	<0.0001	F (2, 32) = 59.89		ZT12~17	216.333	4.0487	12.1461	155.407	7.4149	22.2447	<0.0001	-3.39961
Condition x Time	p value	F value		ZT18~23	181.667	10.2418	30.7254	208.444	8.36035	25.081	0.1708	0.954792
	<0.0001	F (2, 32) = 18.48
F
Gonadectomized male mice				Gonadectomized male mice
Two-way ANOVA				Sidak test
Condition	p value	F value			Baseline			Gentle handling
	0.0246	F (1, 16) = 6.153		NREMS	Mean	S.E.M.	SD	Mean	S.E.M	SD	p value	Cohen's d
Time	p value	F value		ZT6~11	201.352	4.04302	12.1291	210.815	3.59703	10.7911	0.2704	0.82433
	<0.0001	F (2, 32) = 58.25		ZT12~17	131.963	3.53573	10.6072	179.667	6.44157	19.3247	<0.0001	3.06033
Condition x Time	p value	F value		ZT18~23	156.889	8.53352	25.6006	133.667	7.1654	21.4962	0.1535	-0.982423
	<0.0001	F (2, 32) = 17.38
G
Gonadectomized male mice				Gonadectomized male mice
Two-way ANOVA				Sidak test
Condition	p value	F value			Baseline			Gentle handling
	0.0015	F (1, 16) = 14.57		REMS	Mean	S.E.M.	SD	Mean	S.E.M	SD	p value	Cohen's d
Time	p value	F value		ZT6~11	28.8519	1.86927	5.60781	34.1481	2.01239	6.03718	0.2004	0.909009
	<0.0001	F (2, 32) = 43.24		ZT12~17	11.7037	0.675736	2.02721	25.2593	1.12324	3.36971	<0.0001	4.87488
Condition x Time	p value	F value		ZT18~23	21.4444	1.98917	5.9675	17.8889	1.31233	3.937	0.4033	-0.703339
	<0.0001	F (2, 32) = 15.28
H
Gonadectomized male mice				Gonadectomized male mice
Two-way ANOVA				Sidak test
Condition	p value	F value			Baseline			Gentle handling
	0.4734	F (1, 119) = 0.5174		Delta density	Mean	S.E.M.	SD	Mean	S.E.M	SD
Time	p value	F value		ZT0	12.0155	0.633606	1.90082
	0.2415	F (17, 144) = 1.240		ZT1	11.116	0.566008	1.69802
Condition x Time	p value	F value		ZT2	10.6594	0.566098	1.69829
	<0.0001	F (17, 119) = 8.902		ZT3	10.6437	0.510522	1.53156
				ZT4	10.564	0.561775	1.68533
				ZT5	10.1164	0.573957	1.72187				p value	Cohen's d
				ZT6	9.9258	0.582085	1.74625	12.9512	0.898207	2.54051	<0.0001	1.38788
				ZT7	9.7304	0.660228	1.98068	11.8758	0.86723	2.4529	<0.0001	0.96235
				ZT8	9.48601	0.507219	1.52166	10.7202	0.752081	2.12721	0.068	0.667368
				ZT9	9.05199	0.514486	1.54346	10.4727	0.770629	2.17967	0.0154	0.752249
				ZT10	9.34297	0.535294	1.60588	10.2114	0.705926	1.99666	0.3864	0.479316
				ZT11	8.99069	0.45776	1.37328	9.34358	0.653857	1.84939	0.9987	0.216656
				ZT12	7.80303	0.767926	2.30378	9.12639	0.593494	1.57024	0.9949	0.671272
				ZT13	10.4688	0.990428	2.97128	9.76813	0.884857	2.50275	>0.9999	-0.255057
				ZT14	10.8479	0.855191	2.56557	9.83281	0.798391	2.25819	0.9598	-0.420001
				ZT15	11.0591	0.752247	2.25674	9.94542	0.748599	2.11736	0.9579	-0.508968
				ZT16	10.4235	0.708783	2.12635	9.46036	0.616437	1.74355	0.9381	-0.495349
				ZT17	11.1671	0.788477	2.36543	9.52831	0.657769	1.86045	0.1997	-0.770116
				ZT18	10.9808	0.628341	1.88502	9.41678	0.708405	2.00367	0.1432	-0.80404
				ZT19	10.7293	0.632285	1.89685	9.73495	0.718384	2.0319	0.8487	-0.505875
				ZT20	10.2804	0.68215	2.04645	9.30296	0.684778	1.93685	0.98	-0.490597
				ZT21	10.1507	0.608489	1.82547	9.54177	0.994644	2.43637	0.9998	-0.282848
				ZT22	9.24173	0.754239	2.26272	8.54709	0.561919	1.4867	>0.9999	-0.362842
				ZT23	11.1343	0.589155	1.76747	8.40913	1.26792	2.83517	0.0001	-1.15354
I
Hormone-supplemented male mice				Hormone-supplemented male mice
Two-way ANOVA				Sidak test
Condition	p value	F value			Baseline			Gentle handling
	0.0871	F (1, 12) = 3.471		Wake	Mean	S.E.M.	SD	Mean	S.E.M	SD	p value	Cohen's d
Time	p value	F value		ZT6~11	120.167	4.23046	11.1928	109.571	3.9452	10.438	0.2515	-0.979049
	<0.0001	F (2, 24) = 81.13		ZT12~17	267.952	13.9776	36.9813	214.571	16.3923	43.3699	0.0859	-1.32451
Condition x Time	p value	F value		ZT18~23	210.452	8.21485	21.7344	223.143	11.4311	30.244	0.7694	0.481881
	0.0146	F (2, 24) = 5.069
J
Hormone-supplemented male mice				Hormone-supplemented male mice
Two-way ANOVA				Sidak test
Condition	p value	F value			Baseline			Gentle handling
	0.2781	F (1, 12) = 1.291		NREMS	Mean	S.E.M.	SD	Mean	S.E.M	SD	p value	Cohen's d
Time	p value	F value		ZT6~11	209.571	4.79319	12.6816	213.143	4.51151	11.9363	0.9347	0.290016
	<0.0001	F (2, 24) = 71.86		ZT12~17	86.0714	12.835	33.9582	128.286	14.0114	37.0707	0.133	1.18751
Condition x Time	p value	F value		ZT18~23	137.429	7.55831	19.9974	121.476	10.1655	26.8954	0.5502	-0.67313
	0.013	F (2, 24) = 5.231
K
Hormone-supplemented male mice				Hormone-supplemented male mice
Two-way ANOVA				Sidak test
Condition	p value	F value			Baseline			Gentle handling
	<0.0001	F (1, 12) = 70.29		REMS	Mean	S.E.M.	SD	Mean	S.E.M	SD	p value	Cohen's d
Time	p value	F value		ZT6~11	30.2619	0.842691	2.22955	37.1429	1.33503	3.53217	0.0041	2.32971
	<0.0001	F (2, 24) = 104.4		ZT12~17	5.97619	1.33454	3.53085	17.4286	2.36902	6.26783	0.0061	2.25136
Condition x Time	p value	F value		ZT18~23	12.119	1.26654	3.35095	15.381	1.42804	3.77824	0.3034	0.913445
	0.07	F (2, 24) = 2.977
L
Hormone-supplemented male mice				Hormone-supplemented male mice
Two-way ANOVA				Sidak test
Condition	p value	F value			Baseline			Gentle handling
	0.7455	F (1, 99) = 0.1059		Delta density	Mean	S.E.M.	SD	Mean	S.E.M	SD
Time	p value	F value		ZT0	10.6613	0.570357	1.50902
	0.0013	F (17, 107) = 2.635		ZT1	10.3453	0.660603	1.74779
Condition x Time	p value	F value		ZT2	9.97166	0.580555	1.536
	<0.0001	F (17, 99) = 5.499		ZT3	9.54662	0.435102	1.15117
				ZT4	9.23657	0.437392	1.15723
				ZT5	9.36975	0.550953	1.45768				p value	Cohen's d
				ZT6	8.92144	0.438258	1.15952	11.1493	0.689822	1.8251	<0.0001	1.45711
				ZT7	8.82306	0.451031	1.19332	10.3944	0.542894	1.43636	0.0077	1.19002
				ZT8	8.37254	0.454954	1.20369	9.80103	0.554079	1.46595	0.0229	1.06505
				ZT9	8.33343	0.406612	1.07579	9.4962	0.496804	1.31442	0.138	0.968132
				ZT10	8.75042	0.922808	2.44152	8.52625	0.430674	1.13946	>0.9999	-0.117663
				ZT11	8.10365	0.5114	1.35304	8.10951	0.374771	0.991552	>0.9999	0.0049441
				ZT12	6.81719	0.682017	1.67059	7.13672	0.416445	1.10181	>0.9999	0.225802
				ZT13	7.98395	0.38058	1.00692	7.58478	0.438052	1.15898	0.9996	-0.36769
				ZT14	8.09691	0.279424	0.739286	7.55139	0.321277	0.850019	0.9852	-0.684824
				ZT15	8.72669	0.509433	1.24785	6.84089	0.505954	1.33863	0.014	-1.4573
				ZT16	7.99413	0.498477	1.22102	6.96539	0.664681	1.62813	0.8843	-0.714877
				ZT17	7.77993	0.559157	1.36965	7.8169	0.930623	2.27955	>0.9999	0.0196557
				ZT18	9.30792	0.296202	0.783676	8.46285	0.539266	1.32093	0.6383	-0.778111
				ZT19	9.42092	0.440214	1.1647	8.34341	0.288357	0.76292	0.2252	-1.09445
				ZT20	8.92006	0.560616	1.48325	8.65856	0.603489	1.59668	>0.9999	-0.169698
				ZT21	8.55777	0.296775	0.785194	8.47194	0.483789	1.18504	>0.9999	-0.085393
				ZT22	8.39954	0.43842	1.15995	7.98114	0.472235	1.15673	0.9989	-0.361206
				ZT23	9.17854	0.522651	1.28023	7.79112	0.901624	2.38547	0.2452	-0.724744
M
Male mice				Male mice
Two-way ANOVA				Sidak test
Condition	p value	F value			Intact			Gonadectomy			Testosterone
	0.0114	F (2, 54) = 4.868		Wake	Mean	S.E.M.	SD	Mean	S.E.M	SD	Mean	S.E.M	SD
Time	p value	F value		ZT6~11	0.761333	0.0311487	0.0762985	0.864135	0.0436136	0.123358	0.917857	0.0434574	0.114977
	<0.0001	F (2, 54) = 37.58		ZT12~17	0.801833	0.0383548	0.0939498	0.705606	0.0326879	0.0924553	0.797571	0.0320319	0.0847484
Condition x Time	p value	F value		ZT18~23	0.915167	0.0189621	0.0464475	1.14455	0.0531161	0.150235	1.06014	0.0344144	0.0910521
	0.0026	F (4, 54) = 4.680
				p value	ZT6~11	ZT12~17	ZT18~23		Cohen's d	ZT6~11	ZT12~17	ZT18~23
				Intact vs. Gonadectomy	0.2005	0.25	0.0004		Intact vs. Gonadectomy	1.00232	-1.03242	2.06293
				Intact vs. Testosterone	0.0265	0.9998	0.0443		Intact vs. Testosterone	1.60416	-0.0476364	2.00585
				Gonadectomy vs. Testosterone	0.6873	0.2521	0.3222		Gonadectomy vs. Testosterone	0.450534	1.03698	-0.679502
N
Male mice				Male mice
Two-way ANOVA				Sidak test
Condition	p value	F value			Intact			Gonadectomy			Testosterone
	0.0008	F (2, 54) = 8.143		NREMS	Mean	S.E.M.	SD	Mean	S.E.M	SD	Mean	S.E.M	SD
Time	p value	F value		ZT6~11	1.10967	0.0247045	0.0605134	1.07061	0.0288563	0.0816179	1.021	0.0312395	0.0826519
	<0.0001	F (2, 54) = 64.53		ZT12~17	1.82233	0.144654	0.35433	1.38115	0.0568386	0.160764	1.58214	0.146551	0.387738
Condition x Time	p value	F value		ZT18~23	1.1085	0.0302916	0.0741991	0.880723	0.0334233	0.0945352	0.882429	0.0510713	0.135122
	0.1	F (4, 54) = 2.052
				p value	ZT6~11	ZT12~17	ZT18~23		Cohen's d	ZT6~11	ZT12~17	ZT18~23
				Intact vs. Gonadectomy	0.9755	0.0003	0.097		Intact vs. Gonadectomy	-0.543688	-1.60353	-2.68044
				Intact vs. Testosterone	0.7979	0.0863	0.1157		Intact vs. Testosterone	-1.22411	-0.646699	-2.07399
				Gonadectomy vs. Testosterone	0.9459	0.1412	>0.9999		Gonadectomy vs. Testosterone	-0.60394	0.677184	0.0146292
O
Male mice				Male mice
Two-way ANOVA				Sidak or Kruskal Wallis test
Condition	p value	F value			Intact			Gonadectomy			Testosterone
	0.0005	F (2, 54) = 8.777		REMS	Mean	S.E.M.	SD	Mean	S.E.M	SD	Mean	S.E.M	SD
Time	p value	F value		ZT6~11	1.36067	0.0554723	0.135879	1.21685	0.0553551	0.156568	1.225	0.0338702	0.0896121
	<0.0001	F (2, 54) = 59.88		ZT12~17	3.68683	0.622234	1.52416	2.19764	0.129215	0.365476	3.37457	0.359524	0.95121
Condition x Time	p value	F value		ZT18~23	1.5255	0.121539	0.297709	0.866997	0.0590592	0.167045	1.36071	0.210108	0.555894
	0.047	F (4, 54) = 2.586
				p value	ZT6~11	ZT12~17	ZT18~23		Cohen's d	ZT6~11	ZT12~17	ZT18~23
				Intact vs. Gonadectomy	0.7208	0.0339	0.0003		Intact vs. Gonadectomy	-0.9811	-1.34368	-2.72801
				Intact vs. Testosterone	0.7709	>0.9999	0.6506		Intact vs. Testosterone	-1.17874	-0.245797	-0.36956
				Gonadectomy vs. Testosterone	>0.9999	0.0224	0.0047		Gonadectomy vs. Testosterone	0.0639032	1.63339	1.2029
P
Male mice				Male mice
Two-way ANOVA				Sidak test
Condition	p value	F value			Intact			Gonadectomy			Testosterone
	<0.0001	F (2, 114) = 32.44		Delta decy	Mean	S.E.M.	SD	Mean	S.E.M	SD	Mean	S.E.M	SD
Time	p value	F value		ZT6	1.53801	0.0412355	0.101006	1.53569	0.0577671	0.173301	1.28917	0.0435665	0.115266
	<0.0001	F (5, 114) = 52.76		ZT7	1.32761	0.0296252	0.0725667	1.32037	0.047528	0.142584	1.12635	0.0443646	0.117378
Condition x Time	p value	F value		ZT8	1.23248	0.0160669	0.0393557	1.2039	0.0286719	0.0860157	1.08556	0.0277592	0.073444
	0.3837	F (10, 114) = 1.080		ZT9	1.14032	0.0299261	0.0733038	1.20725	0.0399713	0.119914	1.02724	0.0295045	0.0780617
				ZT10	1.05435	0.0437225	0.107098	1.10783	0.0368683	0.110605	0.960686	0.0231808	0.0613307
				ZT11	0.997213	0.0170296	0.0417139	1.06438	0.0272158	0.0816474	0.959463	0.0422822	0.111868
					p value			Cohen's d
					Intact vs. Gonadectomy	Intact vs. Testosterone	Gonadectomy vs. Testosterone	Intact vs. Gonadectomy	Intact vs. Testosterone	Gonadectomy vs. Testosterone
				ZT6	0.9989	<0.0001	<0.0001	-0.016403	-2.29625	-1.67504
				ZT7	0.989	0.0014	0.0003	-0.0640347	-2.06256	-1.48571
				ZT8	0.8428	0.0249	0.1326	-0.427156	-2.49355	-1.47975
				ZT9	0.3994	0.1038	0.0017	0.673447	-1.49341	-1.77917
				ZT10	0.5534	0.2054	0.0138	0.49128	-1.07327	-1.6454
				ZT11	0.3969	0.7656	0.1548	1.03597	-0.44715	-1.0713

## Sheet: Fig. 4
Statistical summary of Figure 4
A
Intact female mice				Intact female mice
Two-way ANOVA				Sidak test
Condition	p value	F value			Baseline			Gentle handling
	0.0518	F (1, 10) = 4.871		Wake	Mean	S.E.M.	SD	Mean	S.E.M	SD	p value	Cohen's d
Time	p value	F value		ZT6~11	154.119	6.64448	17.5796	115.6	7.73908	17.3051	0.0134	-2.20829
	<0.0001	F (2, 20) = 358.5		ZT12~17	339.238	11.4126	30.195	313.867	15.0512	33.6556	0.5172	-0.793547
Condition x Time	p value	F value		ZT18~23	251.095	9.98748	26.4244	233.267	10.2282	22.8709	0.5648	-0.721466
	0.3636	F (2, 20) = 1.065
B
Intact female mice				Intact female mice
Two-way ANOVA
Condition	p value	F value
	0.0714	F (1, 10) = 4.065
Time	p value	F value		No post-hoc test has done because two-way ANOVA was not significant for the interaction or condition.
	<0.0001	F (2, 20) = 363.5
Condition x Time	p value	F value
	0.2684	F (2, 20) = 1.406
C
Intact female mice				Intact female mice
Two-way ANOVA	C			Sidak test
Condition	p value	F value			Baseline			Gentle handling
	0.0122	F (1, 10) = 9.316		REMS	Mean	S.E.M.	SD	Mean	S.E.M	SD	p value	Cohen's d
Time	p value	F value		ZT6~11	29.0476	1.72927	4.57521	33.8	0.478423	1.06979	0.0971	1.4304
	<0.0001	F (2, 20) = 197.2		ZT12~17	1.64286	0.913905	2.41797	4.8	1.73397	3.87728	0.4002	0.977114
Condition x Time	p value	F value		ZT18~23	11.5714	1.37044	3.62586	15.9333	2.1587	4.82701	0.3441	1.02179
	0.8467	F (2, 20) = 0.1678
D
Intact female mice				Intact female mice
Two-way ANOVA				Sidak test
Condition	p value	F value			Baseline			Gentle handling
	0.0369	F (1, 44) = 4.632		Delta density	Mean	S.E.M.	SD	Mean	S.E.M	SD
Time	p value	F value		ZT0	13.3911	1.05928	2.80258
	0.2458	F (16, 89) = 1.253		ZT1	12.719	0.988525	2.61539
Condition x Time	p value	F value		ZT2	12.0324	1.0038	2.6558
	0.0003	F (16, 44) = 3.648		ZT3	12.3454	0.998682	2.64226
				ZT4	11.52	1.00166	2.65014
				ZT5	10.8864	0.93805	2.48185				p value	Cohen's d
				ZT6	10.7583	1.00632	2.66247	12.7746	1.35801	3.0366	0.0378	0.706079
				ZT7	10.5491	0.973231	2.57493	11.8271	1.23079	2.75214	0.6926	0.479579
				ZT8	9.96869	0.842268	2.22843	10.7056	1.21513	2.71711	0.9983	0.29657
				ZT9	10.2375	0.953797	2.52351	10.8049	1.33504	2.98524	0.9936	0.205262
				ZT10	10.1982	1.05354	2.78741	10.5486	1.4254	3.18729	>0.9999	0.117055
				ZT11	10.1795	1.03138	2.72878	10.001	1.27087	2.84175	>0.9999	-0.0640562
				ZT12	10.7467	2.05263	4.10526	7.40951	2.07883	3.60064	>0.9999	-0.864289
				ZT13	9.79035	2.8086	4.86464	8.40638	0.860581	1.72116	>0.9999	-0.379296
				ZT14	8.58006	2.01242	3.48561	9.00228	1.37987	2.39001	>0.9999	0.141281
				ZT15	8.026	4.14735	5.86525	7.6473	1.85996	3.71993	>0.9999	-0.0771097
				ZT16				9.1973	1.90855	2.6991
				ZT17	12.8714	0.93955	1.8791	11.1788	3.98727	6.90615	0.0028	-0.33444
				ZT18	13.2551	1.25677	3.07845	12.6812	1.40964	3.15206	0.9943	-0.184209
				ZT19	12.3159	1.48112	3.91867	9.88313	0.58124	1.16248	0.8465	-0.841725
				ZT20	12.4979	0.870655	2.13266	12.6903	1.81792	3.63585	0.9997	0.0645614
				ZT21	12.597	0.960434	2.54107	12.599	1.52785	3.41637	>0.9999	0.00068012
				ZT22	12.5956	1.18028	2.63919	12.6039	1.10047	2.20093	>0.9999	0.00344424
				ZT23	12.908	1.27289	3.36776	11.2743	3.55264	5.02419	0.0014	-0.381989
E
Gonadectomized female mice				Gonadectomized female mice
Two-way ANOVA				Sidak test
Condition	p value	F value			Baseline			Gentle handling
	0.0001	F (1, 16) = 25.72		Wake	Mean	S.E.M.	SD	Mean	S.E.M	SD	p value	Cohen's d
Time	p value	F value		ZT6~11	128.074	2.50541	7.51624	112.407	5.62588	16.8776	0.0794	-1.1992
	<0.0001	F (2, 32) = 112.5		ZT12~17	242.241	6.49163	19.4749	191.074	9.19285	27.5786	0.0013	-2.14328
Condition x Time	p value	F value		ZT18~23	222.556	7.47	22.41	219.37	8.59341	25.7802	0.9898	-0.131869
	0.0097	F (2, 32) = 5.373
F
Gonadectomized female mice				Gonadectomized female mice
Two-way ANOVA				Sidak test
Condition	p value	F value			Baseline			Gentle handling
	0.0016	F (1, 16) = 14.44		NREMS	Mean	S.E.M.	SD	Mean	S.E.M	SD	p value	Cohen's d
Time	p value	F value		ZT6~11	203.37	2.53338	7.60015	211.296	4.46435	13.393	0.3797	0.727891
	<0.0001	F (2, 32) = 92.31		ZT12~17	108.315	5.89376	17.6813	148.963	8.60527	25.8158	0.0047	1.83715
Condition x Time	p value	F value		ZT18~23	122.833	7.06211	21.1863	121.63	7.83734	23.512	0.9993	-0.0537879
	0.0131	F (2, 32) = 4.976
G
Gonadectomized female mice				Gonadectomized female mice
Two-way ANOVA				Sidak test
Condition	p value	F value			Baseline			Gentle handling
	0.0002	F (1, 16) = 22.90		REMS	Mean	S.E.M.	SD	Mean	S.E.M	SD	p value	Cohen's d
Time	p value	F value		ZT6~11	28.5556	0.881042	2.64313	36.2963	2.96869	8.90606	0.0953	1.17837
	<0.0001	F (2, 32) = 101.3		ZT12~17	9.44444	1.03265	3.09794	19.963	1.35793	4.07378	<0.0001	2.90655
Condition x Time	p value	F value		ZT18~23	14.6111	1.01759	3.05278	19	1.15737	3.47211	0.0349	1.34251
	0.0944	F (2, 32) = 2.544
H
Gonadectomized female mice				Gonadectomized female mice
Two-way ANOVA				Sidak test
Condition	p value	F value			Baseline			Gentle handling
	<0.0001	F (1, 119) = 24.01		Delta density	Mean	S.E.M.	SD	Mean	S.E.M	SD
Time	p value	F value		ZT0	13.8327	1.07002	3.21006
	0.9146	F (17, 140) = 0.5620		ZT1	12.7557	0.957027	2.87108
Condition x Time	p value	F value		ZT2	11.5877	0.90349	2.71047
	<0.0001	F (17, 119) = 5.984		ZT3	11.6418	0.799008	2.39702
				ZT4	11.1777	0.736032	2.2081
				ZT5	11.2325	0.891411	2.67423				p value	Cohen's d
				ZT6	11.0236	0.877077	2.63123	14.1292	1.1141	3.34229	<0.0001	1.0325
				ZT7	10.4356	0.803379	2.41014	13.0504	0.920349	2.76105	<0.0001	1.00897
				ZT8	10.4166	0.898128	2.69438	12.5563	0.957336	2.87201	0.0001	0.768427
				ZT9	10.1517	0.785399	2.3562	11.7126	0.92749	2.78247	0.0144	0.605447
				ZT10	9.9678	0.822181	2.46654	11.2791	0.909059	2.72718	0.0795	0.504306
				ZT11	9.57194	0.661821	1.98546	10.8057	0.93482	2.80446	0.1275	0.507763
				ZT12	9.18062	1.08151	3.05898	10.1585	0.863794	2.44318	0.9614	0.35326
				ZT13	11.4278	0.964848	2.729	11.3694	0.93931	2.81793	0.9993	-0.0210702
				ZT14	11.3665	0.839081	2.51724	10.9605	0.698552	1.84819	0.9243	-0.183848
				ZT15	11.4753	0.820492	2.46147	11.087	0.822549	2.46765	0.9999	-0.157539
				ZT16	10.9482	1.05802	3.17405	10.5946	0.917025	2.42622	>0.9999	-0.125157
				ZT17	11.5323	0.860727	2.58218	11.0745	1.08972	3.08221	>0.9999	-0.160996
				ZT18	11.1332	0.824973	2.47492	11.0272	0.901629	2.55019	0.9999	-0.0422023
				ZT19	11.912	1.16672	3.50015	11.4771	1.01608	3.04823	0.9994	-0.132516
				ZT20	11.4428	1.0593	3.17789	10.5917	0.97562	2.75947	>0.9999	-0.286002
				ZT21	10.7206	0.822962	2.46889	10.675	1.49405	4.22581	>0.9999	-0.0131592
				ZT22	9.02694	1.02095	2.70117	11.5962	2.38722	4.13479	>0.9999	0.735681
				ZT23	11.4076	1.85659	4.15147	9.59712	0.85508	1.48104	>0.9999	-0.580874
I
Hormone-supplemented female mice				Hormone-supplemented female mice
Two-way ANOVA				Sidak test
Condition	p value	F value			Baseline			Gentle handling
	0.1191	F (1, 12) = 2.817		Wake	Mean	S.E.M.	SD	Mean	S.E.M	SD	p value	Cohen's d
Time	p value	F value		ZT6~11	149.119	4.36128	11.5389	123.952	3.54818	9.3876	0.0025	-2.39264
	<0.0001	F (2, 24) = 551.0		ZT12~17	326.333	7.23783	19.1495	302.619	7.69437	20.3574	0.1276	-1.19995
Condition x Time	p value	F value		ZT18~23	297.857	11.5893	30.6624	300.381	10.8609	28.7353	0.9981	0.0849354
	0.0485	F (2, 24) = 3.441
J
Hormone-supplemented female mice				Hormone-supplemented female mice
Two-way ANOVA				Sidak test
Condition	p value	F value			Baseline			Gentle handling
	0.1639	F (1, 12) = 2.198		NREMS	Mean	S.E.M.	SD	Mean	S.E.M	SD	p value	Cohen's d
Time	p value	F value		ZT6~11	173.595	3.97842	10.5259	196.762	4.55113	12.0412	0.0074	2.04853
	<0.0001	F (2, 24) = 478.6		ZT12~17	29.4762	6.51661	17.2413	49.619	7.71429	20.4101	0.1955	1.0662
Condition x Time	p value	F value		ZT18~23	55.5952	10.5619	27.944	50.9048	9.17372	24.2714	0.9831	-0.179216
	0.0249	F (2, 24) = 4.323
K
Hormone-supplemented female mice				Hormone-supplemented female mice
Two-way ANOVA
Condition	p value	F value
	0.0593	F (1, 12) = 4.339
Time	p value	F value		No post-hoc test has done because two-way ANOVA was not significant for the interaction or condition.
	<0.0001	F (2, 24) = 292.0
Condition x Time	p value	F value
	0.8494	F (2, 24) = 0.1643
L
Hormone-supplemented female mice				Hormone-supplemented female mice
Two-way ANOVA				Sidak test
Condition	p value	F value			Baseline			Gentle handling
	0.0541	F (1, 59) = 3.862		Delta density	Mean	S.E.M.	SD	Mean	S.E.M	SD
Time	p value	F value		ZT0	14.5252	1.56704	4.146
	0.5224	F (1, 59) = 3.862		ZT1	13.7217	1.35907	3.59577
Condition x Time	p value	F value		ZT2	12.7075	1.26538	3.34787
	0.0321	F (16, 59) = 1.959		ZT3	11.9258	1.23331	3.26302
				ZT4	11.4438	1.006	2.66163
				ZT5	10.8087	1.08254	2.86413				p value	Cohen's d
				ZT6	10.1739	1.0287	2.72169	12.9384	1.18762	3.14215	0.0132	0.940489
				ZT7	9.60321	0.877943	2.32282	12.4556	1.06949	2.82961	0.0093	1.1019
				ZT8	9.13384	0.851796	2.25364	10.8995	0.867827	2.29605	0.3761	0.776139
				ZT9	9.26957	0.864072	2.28612	10.9872	1.15697	3.06105	0.4214	0.635808
				ZT10	9.70541	1.01178	2.67692	10.0503	0.89266	2.36176	>0.9999	0.136626
				ZT11	9.1578	0.853364	2.25779	10.1072	0.92817	2.45571	0.9879	0.40249
				ZT12	7.5525	1.80667	2.55502	8.6591	2.08212	4.16425	>0.9999	0.320324
				ZT13	8.56019	0.439797	1.07728	9.96316	1.43401	3.20655	0.8502	0.586548
				ZT14	10.6642	1.57505	3.85808	10.9449	1.86978	4.18094	0.9999	0.0697762
				ZT15	9.34718	2.1475	4.80195	9.46331	0.930508	1.86102	0.9843	0.0318896
				ZT16	9.44799	1.77488	3.96876	11.0674	0.187024	0.264492	>0.9999	0.575794
				ZT17	7.39437	1.34566	2.69131	12.1181	0	0	0.9992	2.48217
				ZT18	9.21933	2.30569	3.99356	11.1014	1.90645	3.30207	>0.9999	0.513633
				ZT19	8.82506	1.84344	4.12207	10.093	1.60956	3.94261	>0.9999	0.314353
				ZT20	12.6219	1.11244	2.94323	11.8082	1.13141	2.99343	0.9978	-0.274126
				ZT21	13.8962	1.88805	4.22182	12.3533	1.37559	2.38259	0.9944	-0.450122
				ZT22	8.48178	1.68808	3.37616
				ZT23	12.6562	1.41074	3.45559	7.45204	0	0	0.9865	-2.12981
M
Female mice				Female mice
Two-way ANOVA				Sidak test
Condition	p value	F value			Intact			Gonadectomy			Estradiol
	0.405	F (2, 54) = 0.9192		Wake	Mean	S.E.M.	SD	Mean	S.E.M	SD	Mean	S.E.M	SD
Time	p value	F value		ZT6~11	0.7524	0.048401	0.108228	0.881123	0.0501359	0.150408	0.835714	0.0346119	0.0915746
	<0.0001	F (2, 54) = 12.99		ZT12~17	0.9454	0.0319352	0.0714094	0.790464	0.0370954	0.111286	0.928143	0.0216051	0.0571618
Condition x Time	p value	F value		ZT18~23	0.9712	0.0212636	0.0475468	0.989629	0.0373043	0.111913	1.01414	0.0406251	0.107484
	0.0163	F (4, 54) = 3.340
				p value	ZT6~11	ZT12~17	ZT18~23		Cohen's d	ZT6~11	ZT12~17	ZT18~23
				Intact vs. Gonadectomy	0.0808	0.0284	0.947		Intact vs. Gonadectomy	0.98242	-1.6571	0.214338
				Intact vs. Estradiol	0.3718	0.9576	0.7655		Intact vs. Estradiol	0.831084	-0.266812	0.516718
				Gonadectomy vs. Estradiol	0.6689	0.0316	0.8888		Gonadectomy vs. Estradiol	-0.364681	1.55631	0.223421
N
Female mice				Female mice
Two-way ANOVA
Condition	p value	F value
	0.4106	F (2, 54) = 0.9051
Time	p value	F value
	0.0396	F (2, 54) = 3.429		No post-hoc test has done because two-way ANOVA was not significant for the interaction or condition.
Condition x Time	p value	F value
	0.504	F (4, 54) = 0.8431
O
Female mice				Female mice
Two-way ANOVA
Condition	p value	F value
	0.5696	F (2, 52) = 0.5690
Time	p value	F value		No post-hoc test has done because two-way ANOVA was not significant for the interaction or condition.
	0.0007	F (2, 52) = 8.469
Condition x Time	p value	F value
	0.6844	F (4, 52) = 0.5716
P
Female mice				Female mice
Two-way ANOVA	Condition x Time			Sidak test
Condition	p value	F value			Intact			Gonadectomy			Estradiol
	0.0004	F (2, 96) = 8.425		Delta decay	Mean	S.E.M.	SD	Mean	S.E.M	SD	Mean	S.E.M	SD
Time	p value	F value		ZT6	1.3971	0.0718785	0.160725	1.32601	0.0406985	0.107678	1.40883	0.0299519	0.0792453
	<0.0001	F (5, 96) = 25.04		ZT7	1.11485	0.039486	0.0882934	1.23566	0.0422346	0.111742	1.2893	0.035152	0.0930036
Condition x Time	p value	F value		ZT8	1.03116	0.015602	0.034887	1.19629	0.0590178	0.156147	1.18591	0.034271	0.0906726
	0.3097	F (10, 96) = 1.186		ZT9	1.04019	0.0415627	0.092937	1.09507	0.0473398	0.125249	1.18494	0.0556835	0.147325
				ZT10	0.990682	0.028442	0.0635982	1.10224	0.043901	0.116151	1.04138	0.0248309	0.0656965
				ZT11	0.959326	0.0185074	0.0413838	1.06557	0.0673107	0.178087	1.06172	0.0298392	0.0789472
					p value			Cohen's d
					Intact vs. Gonadectomy	Intact vs. Estradiol	Gonadectomy vs. Estradiol	Intact vs. Gonadectomy	Intact vs. Estradiol	Gonadectomy vs. Estradiol
				ZT6	0.4778	0.9797	0.579	-0.519677	0.0925466	0.876034
				ZT7	0.1284	0.0172	0.7621	1.19973	1.92386	0.521769
				ZT8	0.0254	0.0384	>0.9999	1.45959	2.25263	-0.0813001
				ZT9	0.6413	0.0561	0.5375	0.497631	1.17515	0.657213
				ZT10	0.1713	0.684	0.8207	1.19143	0.784089	-0.645051
				ZT11	0.2004	0.2236	>0.9999	0.821794	1.62456	-0.0279434
Q
Male and female mice				Male and female mice
Two-way ANOVA				Sidak test
Sex	p value	F value			Intact			Gonadectomy			Hormone
	0.0512	F (2, 37) = 3.224		Delta power	Mean	S.E.M.	SD	Mean	S.E.M	SD	Mean	S.E.M	SD
Condition	p value	F value		Male	1.53801	0.0412355	0.101006	1.53569	0.0577671	0.173301	1.28917	0.0435665	0.115266
	0.2751	F (1, 37) = 1.227		Female	1.3971	0.0718785	0.160725	1.40584	0.0618055	0.185416	1.40883	0.0299519	0.0792453
Sex x Condition	p value	F value
	0.0382	F (2, 37) = 3.572		p value	Male	Female		Cohen's d	Male	Female
				Intact vs. Gonadectomy	>0.9999	>0.9999		Intact vs. Gonadectomy	-0.016403	0.0503517
				Intact vs. Hormone	0.0239	>0.9999		Intact vs. Hormone	-2.29625	0.0925466
				Gonadectomy vs. Hormone	0.011	>0.9999		Gonadectomy vs. Hormone	-1.67504	0.0209726

## Sheet: Fig. 5
Statistical summary of Figure 5
A
Intact male mice				Intact male mice
After cage changes (ZT6-11,ZT12-17, ZT18-23)
Two-way ANOVA
Condition	p value	F value
	0.0626	F (1, 8) = 4.673
Time	p value	F value		No post-hoc test has done because two-way ANOVA was not significant for the interaction or condition. changing
	<0.0001	F (2, 16) = 118.6
Condition x Time	p value	F value
	0.7953	F (2, 16) = 0.2323
Intact male mice				Intact male mice
During cage changes (ZT0-5)				Sidak test
Two-way ANOVA					Baseline			Cage change
Condition	p value	F value		Wake	Mean	S.E.M.	SD	Mean	S.E.M	SD	p value	Cohen's d
	<0.0001	F (1, 24) = 433.9		ZT0	18.1	2.19	4.897	60	0	0	<0.0001	12.1004
Time	p value	F value		ZT1	18.9	3.03251	6.78089	59.06	0.94	2.1019	<0.0001	8.00019
	0.0001	F (5, 24) = 8.134		ZT2	20.8333	1.87897	4.20151	54.52	3.70964	8.295	<0.0001	5.12349
Condition x Time	p value	F value		ZT3	20.2	3.37984	7.55754	46.8	7.42489	16.6026	<0.0001	2.0622
	<0.0001	F (5, 24) = 8.843		ZT4	11.5	1.61847	3.61901	48.66	1.70429	3.81091	<0.0001	9.99946
				ZT5	14.9333	2.44074	5.45766	26.94	2.26993	5.07573	0.0229	2.27824
B
Intact male mice				Intact male mice
After cage changes (ZT6-11,ZT12-17, ZT18-23)
Two-way ANOVA
Condition	p value	F value
	0.113	F (1, 8) = 3.167		No post-hoc test has done because two-way ANOVA was not significant for the interaction or condition. changing
Time	p value	F value
	<0.0001	F (2, 16) = 109.6
Condition x Time	p value	F value
	0.6981	F (2, 16) = 0.3676
Intact male mice				Intact male mice
During cage changes (ZT0-5)				Sidak test
Two-way ANOVA					Baseline			Cage change
Condition	p value	F value		NREMS	Mean	S.E.M.	SD	Mean	S.E.M	SD	p value	Cohen's d
	<0.0001	F (1, 24) = 351.8		ZT0	37.1	2.13477	4.77349	0	0	0	<0.0001	-10.9914
Time	p value	F value		ZT1	36.4333	2.14709	4.80104	0.94	0.94	2.1019	<0.0001	-9.57741
	0.0002	F (5, 24) = 7.951		ZT2	34.3666	1.87779	4.19887	5.48	3.70964	8.295	<0.0001	-4.39401
Condition x Time	p value	F value		ZT3	34.8333	2.80277	6.26719	11.66	6.54489	14.6348	<0.0001	-2.05851
	<0.0001	F (5, 24) = 9.415		ZT4	42.0667	1.89854	4.24527	11.34	1.70429	3.81091	<0.0001	-7.61704
				ZT5	38.1667	2.21421	4.95113	30.78	2.43113	5.43618	0.255	-1.4207
C
Intact male mice				Intact male mice
After cage changes (ZT6-11,ZT12-17, ZT18-23)				Sidak test
Two-way ANOVA					Baseline			Cage change
Condition	p value	F value		REMS	Mean	S.E.M.	SD	Mean	S.E.M	SD	p value	Cohen's d
	0.0032	F (1, 8) = 17.20		ZT6~11	27.6	1.6334	3.6524	34	3.04122	6.80037	0.3001	1.17254
Time	p value	F value		ZT12~17	4.1	0.976217	2.18289	8.96	1.92031	4.29395	0.1835	1.42685
	<0.0001	F (2, 16) = 66.52		ZT18~23	11.2	2.12132	4.74342	17.12	1.78449	3.99024	0.1858	1.35066
Condition x Time	p value	F value
	0.9354	F (2, 16) = 0.06704
Intact male mice				Intact male mice
During cage changes (ZT0-5)				Sidak test
Two-way ANOVA					Baseline			Cage change
Condition	p value	F value		REMS	Mean	S.E.M.	SD	Mean	S.E.M	SD	p value	Cohen's d
	<0.0001	F (1, 24) = 242.5		ZT0	4.8	0.671648	1.50185	0	0	0	<0.0001	-4.51991
Time	p value	F value		ZT1	4.66667	1.06589	2.38339	0	0	0	<0.0001	-2.76902
	0.0137	F (5, 24) = 3.638		ZT2	4.8	0.620035	1.38644	0	0	0	<0.0001	-4.89615
Condition x Time	p value	F value		ZT3	4.96667	0.604152	1.35092	1.54	0.944246	2.1114	0.0008	-1.93332
	0.1926	F (5, 24) = 1.621		ZT4	6.43333	0.554277	1.2394	0	0	0	<0.0001	-7.34073
				ZT5	6.9	0.323179	0.722649	2.28	0.754586	1.68731	<0.0001	-3.55953
D
Intact male mice				Intact male mice
Two-way ANOVA				Sidak test
Condition	p value	F value			Baseline			Cage change
	0.5103	F (1, 64) = 0.4383		Delta density	Mean	S.E.M.	SD	Mean	S.E.M	SD
Time	p value	F value		ZT0	13.5977	1.21945	2.72677
	0.6366	F (18, 75) = 0.8507		ZT1	12.4104	1.29182	2.88859
Condition x Time	p value	F value		ZT2	11.1907	1.11528	2.49385
	<0.0001	F (18, 64) = 4.640		ZT3	11.3807	0.889742	1.98952
				ZT4	11.0626	1.08483	2.42576				p value	Cohen's d
				ZT5	10.3747	0.884726	1.97831	13.4514	1.63063	3.64619	0.0014	1.04889
				ZT6	9.77816	0.746366	1.66893	12.5077	1.44493	3.23096	0.0071	1.06151
				ZT7	9.67333	0.732985	1.639	11.6856	1.39742	3.12473	0.1306	0.806531
				ZT8	9.97621	0.923508	2.06503	11.6077	1.35959	3.04014	0.4194	0.627805
				ZT9	9.2904	0.815092	1.8226	10.2522	0.996596	2.22846	0.9819	0.472487
				ZT10	9.44632	1.16527	2.60563	10.2384	1.41738	3.16936	0.998	0.273006
				ZT11	9.36786	1.03721	2.31927	9.64701	1.03058	2.30446	>0.9999	0.120748
				ZT12	7.46798	0.362771	0.628338	9.31666	0.862522	1.72504	0.7379	1.42404
				ZT13	8.51115	1.12818	2.52269	8.72811	0.42123	0.941898	>0.9999	0.113939
				ZT14	10.309	1.58248	3.53854	10.1724	1.22278	2.73421	>0.9999	-0.0431916
				ZT15	10.6561	1.74172	3.48345	9.08714	1.21677	2.72079	0.9985	-0.501988
				ZT16	11.3861	2.36781	4.10117	9.04211	0.618941	1.38399	0.4268	-0.76586
				ZT17	11.3939	1.63455	3.26911	11.2693	1.54539	3.4556	>0.9999	-0.0370302
				ZT18	13.0922	1.42689	3.19062	10.0837	1.69809	3.79704	0.002	-0.85787
				ZT19	12.7671	1.09478	2.448	11.448	0.843299	1.88567	0.7687	-0.603689
				ZT20	11.6729	0.987797	2.20878	11.4014	0.959216	2.14487	>0.9999	-0.124692
				ZT21	11.617	1.0115	2.26178	10.2134	0.922781	2.0634	0.6777	-0.648322
				ZT22	11.7098	1.81025	3.6205	9.1364	0.721269	1.44254	0.9989	-0.933809
				ZT23	11.4627	1.5033	3.0066	10.4843	0.315004	0.445483	0.9784	-0.455213
E
Gonadectomized female mice				Gonadectomized female mice
After cage changes (ZT6-11,ZT12-17, ZT18-23)
Two-way ANOVA
Condition	p value	F value
	0.2194	F (1, 12) = 1.679		No post-hoc test has done because two-way ANOVA was not significant for the interaction or condition. changing
Time	p value	F value
	<0.0001	F (2, 24) = 47.06
Condition x Time	p value	F value
	0.5473	F (2, 24) = 0.6182
Gonadectomized female mice				Gonadectomized female mice
During cage changes (ZT0-5)				Sidak test
Two-way ANOVA					Baseline			Cage change
Condition	p value	F value		Wake	Mean	S.E.M.	SD	Mean	S.E.M	SD	p value	Cohen's d
	<0.0001	F (1, 36) = 123.0		ZT0	14.8333	2.8338	7.49752	59.8571	0.142857	0.377964	<0.0001	8.4818
Time	p value	F value		ZT1	26.2381	5.341	14.131	46.3714	3.59958	9.5236	<0.0001	1.67088
	0.0001	F (5, 36) = 7.067		ZT2	16.6667	2.647	7.0033	33.9571	3.11317	8.23668	0.0007	2.2617
Condition x Time	p value	F value		ZT3	17.5714	3.1042	8.21293	31.9619	3.17653	8.40431	0.0055	1.73188
	<0.0001	F (5, 36) = 13.21		ZT4	17.3809	1.71929	4.54881	23.1429	3.00799	7.9584	0.641	0.888935
				ZT5	23.5476	3.60421	9.53585	29.2286	4.08596	10.8104	0.6555	0.557332
F
Gonadectomized female mice				Gonadectomized female mice
After cage changes (ZT6-11,ZT12-17, ZT18-23)
Two-way ANOVA
Condition	p value	F value
	0.609	F (1, 12) = 0.2758		No post-hoc test has done because two-way ANOVA was not significant for the interaction or condition. changing
Time	p value	F value
	<0.0001	F (2, 24) = 46.19
Condition x Time	p value	F value
	0.7747	F (2, 24) = 0.2580
Gonadectomized female mice				Gonadectomized female mice
During cage changes (ZT0-5)				Sidak test
Two-way ANOVA					Baseline			Cage change
Condition	p value	F value		NREMS	Mean	S.E.M.	SD	Mean	S.E.M	SD	p value	Cohen's d
	<0.0001	F (1, 36) = 104.3		ZT0	41.6667	2.34464	6.20334	0.142857	0.142857	0.377964	<0.0001	-9.44892
Time	p value	F value		ZT1	30.2143	4.56981	12.0906	13.6286	3.59958	9.5236	0.0002	-1.524
	0.0002	F (5, 36) = 6.623		ZT2	39.2619	2.37124	6.27372	25.8571	3.08312	8.15718	0.0033	-1.84216
Condition x Time	p value	F value		ZT3	37.6905	2.87652	7.61056	27.1952	3.02671	8.00792	0.0312	-1.34352
	<0.0001	F (5, 36) = 16.15		ZT4	37.5714	1.45563	3.85123	34.7286	3.02511	8.00369	0.9643	-0.45264
				ZT5	32.3333	3.08178	8.15363	28.8	3.86517	10.2263	0.9045	-0.382056
G
Gonadectomized female mice				Gonadectomized female mice
After cage changes (ZT6-11,ZT12-17, ZT18-23)				Sidak test
Two-way ANOVA					Baseline			Cage change
Condition	p value	F value		REMS	Mean	S.E.M.	SD	Mean	S.E.M	SD	p value	Cohen's d
	0.0006	F (1, 12) = 20.99		ZT6~11	26.4714	1.41585	3.74598	36.5143	2.30687	6.10339	0.0122	1.98327
Time	p value	F value		ZT12~17	14.7857	1.71192	4.52932	15.8524	2.05408	5.43459	0.9722	0.213228
	<0.0001	F (2, 24) = 32.87		ZT18~23	16.2762	1.42102	3.75966	17.3381	2.30369	6.095	0.9738	0.209705
Condition x Time	p value	F value
	0.0832	F (2, 24) = 2.763
Gonadectomized female mice				Gonadectomized female mice
During cage changes (ZT0-5)				Sidak test
Two-way ANOVA					Baseline			Cage change
Condition	p value	F value		REMS	Mean	S.E.M.	SD	Mean	S.E.M	SD	p value	Cohen's d
	<0.0001	F (1, 36) = 136.4		ZT0	3.5	0.576204	1.52449	0	0	0	<0.0001	-3.24682
Time	p value	F value		ZT1	3.54762	0.809757	2.14242	0	0	0	<0.0001	-2.34179
	0.0044	F (5, 36) = 4.159		ZT2	4.07143	0.548997	1.45251	0.185714	0.142141	0.37607	<0.0001	-3.6625
Condition x Time	p value	F value		ZT3	4.7381	0.356083	0.942108	0.842857	0.347684	0.919886	<0.0001	-4.18364
	0.4956	F (5, 36) = 0.8939		ZT4	5.04762	0.607182	1.60645	2.12857	0.496518	1.31366	0.001	-1.98929
				ZT5	4.11905	0.766972	2.02922	1.92857	0.543671	1.43842	0.0199	-1.24544
H
Gonadectomized female mice				Gonadectomized female mice
Two-way ANOVA				Sidak test
Condition	p value	F value			Baseline			Cage change
	0.8665	F (1, 108) = 0.02840		Delta density	Mean	S.E.M.	SD	Mean	S.E.M	SD
Time	p value	F value		ZT0	9.91987	0.287575	0.760853
	0.0002	F (18, 113) = 3.001		ZT1	9.35818	0.226192	0.598449
Condition x Time	p value	F value		ZT2	9.13692	0.196803	0.520693
	0.0049	F (18, 108) = 2.279		ZT3	8.6941	0.159667	0.42244
				ZT4	8.48656	0.24072	0.636885				p value	Cohen's d
				ZT5	8.33023	0.251738	0.666035	9.69765	0.548695	1.45171	0.0056	1.21075
				ZT6	8.25057	0.289121	0.764942	9.26998	0.333164	0.881468	0.1129	1.23526
				ZT7	8.12628	0.253536	0.670794	8.53684	0.359773	0.95187	0.9971	0.498614
				ZT8	7.94614	0.387304	1.02471	8.25736	0.323704	0.856441	>0.9999	0.329566
				ZT9	7.75609	0.237155	0.627454	7.67278	0.232195	0.61433	>0.9999	-0.134158
				ZT10	7.6499	0.401006	1.06096	7.64053	0.280111	0.741104	>0.9999	-0.010249
				ZT11	7.4483	0.300496	0.795037	7.33629	0.271459	0.718213	>0.9999	-0.147839
				ZT12	6.23144	0.493871	1.20973	6.78329	0.35788	0.946861	0.994	0.508019
				ZT13	8.02012	0.292866	0.774851	7.30608	0.338708	0.896138	0.6483	-0.852393
				ZT14	8.49835	0.44973	1.18987	7.85665	0.234487	0.620394	0.8041	-0.676283
				ZT15	8.50526	0.350223	0.926603	7.9463	0.406714	1.07606	0.9281	-0.556666
				ZT16	8.4406	0.313383	0.829134	8.34088	0.346615	0.917057	>0.9999	-0.114063
				ZT17	8.53039	0.334082	0.883897	7.80621	0.402072	1.06378	0.6247	-0.740487
				ZT18	8.72942	0.454219	1.20175	8.47745	0.45906	1.21456	>0.9999	-0.208552
				ZT19	8.54587	0.326511	0.863868	8.2922	0.354307	0.937409	>0.9999	-0.281427
				ZT20	8.18776	0.296694	0.784978	8.03125	0.35097	0.928579	>0.9999	-0.182041
				ZT21	8.10555	0.312163	0.825905	7.88065	0.617185	1.51179	>0.9999	-0.184633
				ZT22	7.93786	0.81893	1.63786	8.155	0.244642	0.547036	>0.9999	0.177833
				ZT23	8.70268	0.557524	1.47507	8.84532	0.489694	1.29561	>0.9999	0.102744
I
Hormone-supplemented male mice				Hormone-supplemented male mice
After cage changes (ZT6-11,ZT12-17, ZT18-23)
Two-way ANOVA
Condition	p value	F value
	0.4375	F (1, 12) = 0.6451		No post-hoc test has done because two-way ANOVA was not significant for the interaction or condition. changing
Time	p value	F value
	<0.0001	F (2, 24) = 96.87
Condition x Time	p value	F value
	0.6592	F (2, 24) = 0.4241
Hormone-supplemented male mice				Hormone-supplemented male mice
During cage changes (ZT0-5)				Sidak test
Two-way ANOVA					Baseline			Cage change
Condition	p value	F value		Wake	Mean	S.E.M.	SD	Mean	S.E.M	SD	p value	Cohen's d
	<0.0001	F (1, 36) = 170.5		ZT0	20.5952	2.98582	7.89975	60	0	0	<0.0001	7.05425
Time	p value	F value		ZT1	21.3333	1.55414	4.11186	55.6143	2.67808	7.08553	<0.0001	5.9179
	<0.0001	F (5, 36) = 10.39		ZT2	18.4762	2.70102	7.14623	44.4286	3.93783	10.4185	<0.0001	2.90507
Condition x Time	p value	F value		ZT3	18.0476	2.693	7.12501	29.9	5.73585	15.1756	0.0878	0.999809
	0.0009	F (5, 36) = 5.348		ZT4	13.4048	1.90267	5.034	28.1857	2.84609	7.53004	0.0181	2.3078
				ZT5	14.5715	2.54402	6.73085	37	6.23003	16.4831	0.0002	1.78151
J
Hormone-supplemented male mice				Hormone-supplemented male mice
After cage changes (ZT6-11,ZT12-17, ZT18-23)
Two-way ANOVA
Condition	p value	F value
	0.2654	F (1, 12) = 1.365		No post-hoc test has done because two-way ANOVA was not significant for the interaction or condition. changing
Time	p value	F value
	<0.0001	F (2, 24) = 80.59
Condition x Time	p value	F value
	0.6959	F (2, 24) = 0.3681
Hormone-supplemented male mice				Hormone-supplemented male mice
During cage changes (ZT0-5)				Sidak test
Two-way ANOVA					Baseline			Cage change
Condition	p value	F value		NREMS	Mean	S.E.M.	SD	Mean	S.E.M	SD	p value	Cohen's d
	<0.0001	F (1, 36) = 146.4		ZT0	35.0476	2.26128	5.98278	0	0	0	<0.0001	-8.28458
Time	p value	F value		ZT1	34.2857	1.51173	3.99966	4.38571	2.67808	7.08553	<0.0001	-5.19697
	<0.0001	F (5, 36) = 10.68		ZT2	35.9762	2.47566	6.54998	14.8714	3.68825	9.7582	<0.0001	-2.53957
Condition x Time	p value	F value		ZT3	36.6667	2.09276	5.53692	27.9143	5.19361	13.741	0.2444	-0.83551
	0.0005	F (5, 36) = 5.772		ZT4	40.9524	1.58144	4.1841	29.0857	2.50955	6.63964	0.0471	-2.13837
				ZT5	39.7381	2.11722	5.60163	21.1429	5.64256	14.9288	0.0006	-1.64926
K
Hormone-supplemented male mice				Hormone-supplemented male mice
After cage changes (ZT6-11,ZT12-17, ZT18-23)				Sidak test
Two-way ANOVA	ANOVA				Baseline			Cage change
Condition	p value	F value		Sidak	Mean	S.E.M.	SD	Mean	S.E.M	SD	p value	Cohen's d
	0.0397	F (1, 12) = 5.323		ZT6~11	28.0429	1.04719	2.77059	32.4286	1.18577	3.13726	0.0504	1.48186
Time	p value	F value		ZT12~17	5.31429	0.953797	2.52351	6.38571	1.93974	5.13207	0.9503	0.26495
	<0.0001	F (2, 24) = 123.7		ZT18~23	9.31429	1.40449	3.71592	12.4714	2.4933	6.59664	0.6529	0.589714
Condition x Time	p value	F value
	0.5988	F (2, 24) = 0.5239
Hormone-supplemented male mice				Hormone-supplemented male mice
During cage changes (ZT0-5)				Sidak test
Two-way ANOVA					Baseline			Cage change
Condition	p value	F value		Sidak	Mean	S.E.M.	SD	Mean	S.E.M	SD	p value	Cohen's d
	<0.0001	F (1, 36) = 190.4		ZT0	4.35714	0.793015	2.09812	0	0	0	<0.0001	-2.93688
Time	p value	F value		ZT1	4.38095	0.290307	0.768079	0	0	0	<0.0001	-8.06635
	0.001	F (5, 36) = 5.284		ZT2	5.54762	0.439026	1.16155	0.714286	0.365428	0.966831	<0.0001	-4.5229
Condition x Time	p value	F value		ZT3	5.28571	0.677212	1.79173	2.2	0.63396	1.6773	0.0005	-1.77804
	0.3199	F (5, 36) = 1.220		ZT4	5.64286	0.57209	1.51361	2.71429	0.365428	0.966831	0.0009	-2.30597
				ZT5	5.69048	0.536288	1.41888	1.87143	0.671783	1.77737	<0.0001	-2.37481
L
Hormone-supplemented male mice				Hormone-supplemented male mice
After cage changes (ZT6-11,ZT12-17, ZT18-23)
Two-way ANOVA	L
Condition	p value	F value
	0.4116	F (1, 86) = 0.6807		No post-hoc test has done because two-way ANOVA was not significant for the interaction or condition. changing
Time	p value	F value
	<0.0001	F (18, 95) = 3.811
Condition x Time	p value	F value
	0.0535	F (18, 86) = 1.706
M
Male mice				Male mice
Two-way ANOVA				Sidak test
Condition	p value	F value			Intact			Gonadectomy			Testosterone
	0.0004	F (2, 62) = 8.931		Wake	Mean	S.E.M.	SD	Mean	S.E.M	SD	Mean	S.E.M	SD
Time	p value	F value		ZT0~5	2.82	0.0969536	0.216795	1.88676	0.112365	0.297289	2.55	0.187528	0.459347
	<0.0001	F (3, 62) = 241.6		ZT6~11	0.84	0.0244949	0.0547723	0.864017	0.0418695	0.110776	0.95	0.0619139	0.151658
Condition x Time	p value	F value		ZT12~17	0.9	0.0894427	0.2	1.02571	0.0534055	0.141298	1.05714	0.0428571	0.113389
	<0.0001	F (6, 62) = 9.744		ZT18~23	0.92	0.0374166	0.083666	0.979469	0.0309444	0.0818711	1.05714	0.0368856	0.09759
				p value	ZT0~5	ZT6~11	ZT12~17	ZT18~23		Cohen's d	ZT0~5	ZT6~11	ZT12~17	ZT18~23
				Intact vs. Gonadectomy	<0.0001	0.9769	0.5308	0.8666		Intact vs. Gonadectomy	-3.58701	0.274845	0.72597	0.718457
				Intact vs. Testosterone	0.0723	0.6344	0.3743	0.4714		Intact vs. Testosterone	-0.751742	0.964764	0.966625	1.5088
				Gonadectomy vs. Testosterone	<0.0001	0.7188	0.953	0.7467		Gonadectomy vs. Testosterone	1.71426	0.647468	0.245405	0.862332
N
Male mice				Male mice
Two-way ANOVA				Sidak or Kruskal Wallis test
Condition	p value	F value			Intact			Gonadectomy			Testosterone
	0.0231	F (2, 48) = 4.082		NREMS	Mean	S.E.M.	SD	Mean	S.E.M	SD	Mean	S.E.M	SD
Time	p value	F value		ZT0~5	0.28	0.0374166	0.083666	0.603046	0.0413637	0.109438	0.414286	0.063353	0.167616
	<0.0001	F (2, 48) = 142.0		ZT6~11	1.08	0.02	0.0447214	1.04937	0.0189088	0.050028	1	0.0308607	0.0816497
Condition x Time	p value	F value		ZT12~17	2.14	0.907524	2.02929	0.991986	0.043714	0.115656	0.885714	0.0961858	0.254484
	0.0011	F (4, 48) = 5.407		ZT18~23	1.12	0.0860233	0.192354	1.00484	0.0521472	0.137968	0.914286	0.0594762	0.157359
				p value	ZT0~5	ZT6~11	ZT12~17	ZT18~23		Cohen's d	ZT0~5	ZT6~11	ZT12~17	ZT18~23
				Intact vs. Gonadectomy	0.0002	0.9072	>0.9999	0.2633		Intact vs. Gonadectomy	3.31642	-0.645591	-0.798757	-0.68802
				Intact vs. Testosterone	0.1663	0.5195	0.4243	0.0185		Intact vs. Testosterone	1.01373	-1.21529	-0.867321	-1.17063
				Gonadectomy vs. Testosterone	0.0178	0.7394	0.9292	0.3685		Gonadectomy vs. Testosterone	-1.33354	-0.729093	-0.537652	-0.611902
O
Male mice				Male mice
Two-way ANOVA				Sidak test or Kruskal Wallis test (for ZT12-18)
Condition	p value	F value			Intact			Gonadectomy			Testosterone
	0.0317	F (2, 64) = 3.646		REMS	Mean	S.E.M.	SD	Mean	S.E.M	SD	Mean	S.E.M	SD
Time	p value	F value		ZT0~5	0.1	0.0447214	0.1	0.200493	0.0434578	0.114979	0.242857	0.0428571	0.113389
	<0.0001	F (3, 64) = 8.272		ZT6~11	1.24	0.0927362	0.207364	1.38768	0.0911734	0.241222	1.15714	0.0480929	0.127242
Condition x Time	p value	F value		ZT12~17	3.96	1.94643	4.35236	1.11616	0.133951	0.3544	1	0.282843	0.748331
	0.0143	F (6, 64) = 2.909		ZT18~23	1.7	0.242899	0.543139	1.08012	0.0889414	0.235317	1.37143	0.202031	0.534522
				p value	ZT0~5	ZT6~11	ZT12~17	ZT18~23		Cohen's d	ZT0~5	ZT6~11	ZT12~17	ZT18~23
				Intact vs. Gonadectomy	0.913	0.7719	0.7414	0.0019		Intact vs. Gonadectomy	0.932647	0.656577	-0.921002	-1.481
				Intact vs. Testosterone	0.7889	0.9485	0.7414	0.1668		Intact vs. Testosterone	1.33631	-0.481636	-0.947886	-0.609766
				Gonadectomy vs. Testosterone	0.9902	0.3721	>0.9999	0.1864		Gonadectomy vs. Testosterone	0.371011	-1.19548	-0.1984	0.705389
P
Male mice				Male mice
Cage change				Sidak test
Two-way ANOVA					Basal			Cage change
Condition	p value	F value		Wake(2hr)	Mean	S.E.M.	SD	Mean	S.E.M	SD	p value	Cohen's d
	<0.0001	F (1, 16) = 69.58		Intact	13.2167	1.88573	4.21662	37.8	1.14795	2.56688	<0.0001	7.0427
Hormonal status	p value	F value		Gonadectomy	20.4643	1.87444	4.95929	26.1905	2.7498	7.27529	0.2481	0.919732
	0.6449	F (2, 16) = 0.4509		Testosterone	13.9881	0.811506	2.14704	32.5952	3.80578	10.0691	<0.0001	2.55592
Condition x Hormonal status	p value	F value
	0.0037	F (2, 16) = 8.112
Male mice, Cage change				Male mice, Cage change
One-way ANOVA				Sidak test
Hormonal status	p value	F value		Intact			Gonadectomy			Testosterone
	0.0181	F (2, 16) = 3.394		Mean	S.E.M.	SD	Mean	S.E.M	SD	Mean	S.E.M	SD
				37.8	1.14795	2.56688	26.1905	2.7498	7.27529	32.5952	3.80578	10.0691
					Intact vs. Gonadectomy	Intact vs. Testosterone	Gonadectomy vs. Testosterone
				p value	0.0183	0.5455	0.1366
				Cohen's d	-2.12815	-0.708356	0.729139

## Sheet: Fig. 6
Statistical summary of Figure 6
A
Intact female mice				Intact female mice
After cage changes (ZT6-11,ZT12-17, ZT18-23)				Sidak test
Two-way ANOVA					Baseline			Cage change
Condition	p value	F value		Wake	Mean	S.E.M.	SD	Mean	S.E.M	SD	p value	Cohen's d
	0.0321	F (1, 12) = 5.878		ZT6~11	151.957	6.29046	16.643	120.186	3.52477	9.32567	0.0046	-2.35519
Time	p value	F value		ZT12~17	314.914	10.7159	28.3517	296.186	13.9103	36.8031	0.6693	-0.570118
	<0.0001	F (2, 24) = 185.6		ZT18~23	262.757	9.12915	24.1535	237.714	14.2118	37.6009	0.4247	-0.792476
Condition x Time	p value	F value
	0.77	F (2, 24) = 0.2642
Intact female mice				Intact female mice
During cage changes (ZT0-5)				Sidak test
Two-way ANOVA					Baseline			Cage change
Condition	p value	F value		Wake	Mean	S.E.M.	SD	Mean	S.E.M	SD	p value	Cohen's d
	<0.0001	F (1, 36) = 457.6		ZT0	26.6429	2.99322	7.91931	59.2857	0.714286	1.88982	<0.0001	5.67008
Time	p value	F value		ZT1	24.6666	3.69375	9.77275	60	0	0	<0.0001	5.1131
	<0.0001	F (5, 36) = 14.80		ZT2	18.1428	2.76635	7.31907	60	0	0	<0.0001	8.08779
Condition x Time	p value	F value		ZT3	21.7619	4.68594	12.3978	57.4286	1.98501	5.25184	<0.0001	3.74622
	0.0082	F (5, 36) = 3.710		ZT4	15.2381	3.61358	9.56064	45.8572	1.72571	4.5658	<0.0001	4.08703
				ZT5	13.7143	3.09651	8.19261	33.9048	2.5704	6.80063	<0.0001	2.68174
B
Intact female mice				Intact female mice
After cage changes (ZT6-11,ZT12-17, ZT18-23)				Sidak test
Two-way ANOVA					Baseline			Cage change
Condition	p value	F value		NREMS	Mean	S.E.M.	SD	Mean	S.E.M	SD	p value	Cohen's d
	0.0456	F (1, 12) = 4.974		ZT6~11	178.843	5.38025	14.2348	203.514	3.05929	8.09412	0.0085	2.13071
Time	p value	F value		ZT12~17	40.3429	9.5961	25.3889	56.4714	12.4567	32.9572	0.6946	0.548265
	<0.0001	F (2, 24) = 148.7		ZT18~23	86.3857	8.11687	21.4752	108.329	13.9836	36.9971	0.4989	0.725415
Condition x Time	p value	F value
	0.8748	F (2, 24) = 0.1345
Intact female mice				Intact female mice
During cage changes (ZT0-5)				Sidak test
Two-way ANOVA					Baseline			Cage change
Condition	p value	F value		NREMS	Mean	S.E.M.	SD	Mean	S.E.M	SD	p value	Cohen's d
	<0.0001	F (1, 36) = 466.6		ZT0	29.5951	2.52548	6.68178	0.571429	0.571429	1.51186	<0.0001	-5.99148
Time	p value	F value		ZT1	30.9049	2.81245	7.44104	0	0	0	<0.0001	-5.87365
	<0.0001	F (5, 36) = 15.86		ZT2	36.1191	2.28716	6.05126	0	0	0	<0.0001	-8.44125
Condition x Time	p value	F value		ZT3	32.881	3.81722	10.0994	2.57142	1.98501	5.25185	<0.0001	-3.76553
	0.0013	F (5, 36) = 5.085		ZT4	37.7857	3.12777	8.27531	14.0476	1.67999	4.44485	<0.0001	-3.57384
				ZT5	39.6429	2.78873	7.37828	23.9524	2.19358	5.80366	<0.0001	-2.3638
C
Intact female mice				Intact female mice
After cage changes (ZT6-11,ZT12-17, ZT18-23)				Sidak test
Two-way ANOVA					Baseline			Cage change
Condition	p value	F value		REMS	Mean	S.E.M.	SD	Mean	S.E.M	SD	p value	Cohen's d
	0.0084	F (1, 12) = 9.924		ZT6~11	29.2	1.75716	4.64901	36.2857	0.713619	1.88806	0.0174	1.99704
Time	p value	F value		ZT12~17	4.74286	1.19261	3.15534	7.32857	1.5513	4.10435	0.5118	0.706338
	<0.0001	F (2, 24) = 367.6		ZT18~23	10.8857	1.09271	2.89104	13.9429	1.02745	2.71837	0.1807	1.08949
Condition x Time	p value	F value
	0.0751	F (2, 24) = 2.890
Intact female mice				Intact female mice
During cage changes (ZT0-5)				Sidak test
Two-way ANOVA					Baseline			Cage change
Condition	p value	F value		REMS	Mean	S.E.M.	SD	Mean	S.E.M	SD	p value	Cohen's d
	<0.0001	F (1, 36) = 245.4		ZT0	3.76191	0.567947	1.50265	0.142857	0.142857	0.377964	0.0004	-3.30318
Time	p value	F value		ZT1	4.42859	0.926429	2.4511	0	0	0	<0.0001	-2.55516
	0.0006	F (5, 36) = 5.609		ZT2	5.73811	0.618136	1.63543	0	0	0	<0.0001	-4.96194
Condition x Time	p value	F value		ZT3	5.35714	1.01928	2.69677	0	0	0	<0.0001	-2.80934
	0.0878	F (5, 36) = 2.101		ZT4	6.97619	0.641824	1.69811	0.0952386	0.0952386	0.251978	<0.0001	-5.66851
				ZT5	6.64286	0.57555	1.52276	2.14286	0.503202	1.33135	<0.0001	-3.14628
D
Intact female mice				Intact female mice
Two-way ANOVA				Sidak test
Condition	p value	F value			Baseline			Cage change
	0.761	F (1, 81) = 0.09313		Delta density	Mean	S.E.M.	SD	Mean	S.E.M	SD
Time	p value	F value		ZT0	12.8346	0.664221	1.75736
	<0.0001	F (18, 108) = 3.291		ZT1	12.2411	0.572649	1.51509
Condition x Time	p value	F value		ZT2	11.4564	0.520468	1.37703
	0.0002	F (18, 81) = 3.231		ZT3	10.771	0.465418	1.23138
				ZT4	10.5254	0.524326	1.38724				p value	Cohen's d
				ZT5	9.9649	0.429437	1.13618	13.0057	0.691782	1.83028	0.006	1.99619
				ZT6	9.54554	0.324088	0.857456	12.37	0.654153	1.73072	0.0145	2.06804
				ZT7	9.1411	0.370257	0.979609	11.3918	0.653111	1.72797	0.119	1.60244
				ZT8	8.91378	0.377474	0.998702	10.6917	0.499752	1.32222	0.4459	1.51743
				ZT9	8.8732	0.307891	0.814603	10.0308	0.524716	1.38827	0.9599	1.01708
				ZT10	9.32609	0.45872	1.21366	9.90189	0.402814	1.06574	>0.9999	0.504157
				ZT11	9.01587	0.354617	0.938228	9.58314	0.477432	1.26317	>0.9999	0.509851
				ZT12	7.53216	0.9767	2.18397	7.24839	0.977833	2.5871	>0.9999	-0.118533
				ZT13	8.80094	0.472154	1.15654	8.63018	0.86062	2.27699	>0.9999	-0.0945585
				ZT14	8.85252	0.538031	1.4235	8.90297	0.992564	2.43128	>0.9999	0.0253229
				ZT15	9.91656	0.446662	0.773641	7.98934	1.70689	2.95642	0.9926	-0.891863
				ZT16	8.81467	1.96783	3.93565	7.19463	0.859184	1.71837	0.893	-0.5335
				ZT17	8.1988	1.74197	3.89516	8.07506	1.26029	3.08707	>0.9999	-0.0352096
				ZT18	11.5657	1.12372	2.51272	10.2111	0.775311	1.73365	0.9668	-0.627545
				ZT19	12.1442	0.72005	1.90507	10.1088	0.964049	2.36143	0.2683	-0.948704
				ZT20	11.5482	0.621539	1.64444	11.1022	0.64681	1.58436	>0.9999	-0.276259
				ZT21	10.7458	0.809672	2.14219	9.58253	1.08935	2.88214	0.9581	-0.458103
				ZT22	9.91241	1.01678	2.49059	10.1569	0.631698	1.2634	>0.9999	0.123821
				ZT23	12.2271	1.06095	2.37236	10.1595	0	0	0.8708	-1.23252
E
Gonadectomized female mice				Gonadectomized female mice
After cage changes (ZT6-11,ZT12-17, ZT18-23)
Two-way ANOVA
Condition	p value	F value
	0.9909	F (1, 8) = 0.0001385		No post-hoc test has done because two-way ANOVA was not significant for the interaction or condition. changing
Time	p value	F value
	<0.0001	F (2, 16) = 51.20
Condition x Time	p value	F value
	0.511	F (2, 16) = 0.7005
Gonadectomized female mice				Gonadectomized female mice
During cage changes (ZT0-5)				Sidak test
Two-way ANOVA					Baseline			Cage change
Condition	p value	F value		Wake	Mean	S.E.M.	SD	Mean	S.E.M	SD	p value	Cohen's d
	<0.0001	F (1, 24) = 101.8		ZT0	21.6003	2.04638	4.57584	60	0	0	<0.0001	11.8678
Time	p value	F value		ZT1	23.0333	4.46161	9.97647	60	0	0	<0.0001	5.24021
	<0.0001	F (5, 24) = 13.17		ZT2	23.2333	2.5651	5.73573	51.7333	4.81479	10.7662	0.0004	3.30404
Condition x Time	p value	F value		ZT3	16.1998	2.46776	5.51809	38.4	2.74955	6.14818	0.0065	3.80034
	0.0062	F (5, 24) = 4.300		ZT4	17.7668	1.97098	4.40723	32.1333	4.1708	9.3262	0.1374	1.96967
				ZT5	22.4332	5.79618	12.9607	29.7333	6.26489	14.0087	0.7978	0.540957
F
Gonadectomized female mice				Gonadectomized female mice
After cage changes (ZT6-11,ZT12-17, ZT18-23)
Two-way ANOVA
Condition	p value	F value
	0.813	F (1, 8) = 0.05979
Time	p value	F value		No post-hoc test has done because two-way ANOVA was not significant for the interaction or condition. changing
	<0.0001	F (2, 16) = 46.46
Condition x Time	p value	F value
	0.4326	F (2, 16) = 0.8834
Gonadectomized female mice				Gonadectomized female mice
During cage changes (ZT0-5)				Sidak test
Two-way ANOVA					Baseline			Cage change
Condition	p value	F value		NREMS	Mean	S.E.M.	SD	Mean	S.E.M	SD	p value	Cohen's d
	<0.0001	F (1, 24) = 97.46		ZT0	35.6333	1.35548	3.03094	0	0	0	<0.0001	-16.6263
Time	p value	F value		ZT1	33.5667	3.8393	8.58493	0	0	0	<0.0001	-5.52951
	<0.0001	F (5, 24) = 11.50		ZT2	33.3999	2.2795	5.09711	8.26667	4.81479	10.7662	0.0004	-2.98391
Condition x Time	p value	F value		ZT3	39.1335	2.62976	5.88032	20.8666	2.66792	5.96565	0.0115	-3.08398
	0.0012	F (5, 24) = 5.795		ZT4	36.7333	1.7862	3.99407	26.8667	4.03403	9.02037	0.3619	-1.41444
				ZT5	32.9	4.87467	10.9001	28.5333	5.50717	12.3144	0.9592	-0.375505
G
Gonadectomized female mice				Gonadectomized female mice
After cage changes (ZT6-11,ZT12-17, ZT18-23)				Sidak test
Two-way ANOVA					Baseline			Cage change
Condition	p value	F value		REMS	Mean	S.E.M.	SD	Mean	S.E.M	SD	p value	Cohen's d
	0.0449	F (1, 8) = 5.639		ZT6~11	30.1067	1.61205	3.60466	35.0667	1.18748	2.65529	0.1174	1.56676
Time	p value	F value		ZT12~17	7.52	1.74511	3.90218	11.8	2.31041	5.16624	0.4494	0.934897
	<0.0001	F (2, 16) = 71.15		ZT18~23	14.1667	1.90196	4.25291	14.9333	2.51087	5.61447	0.9936	0.153936
Condition x Time	p value	F value
	0.5515	F (2, 16) = 0.6179
Gonadectomized female mice				Gonadectomized female mice
During cage changes (ZT0-5)				Sidak test
Two-way ANOVA					Baseline			Cage change
Condition	p value	F value		REMS	Mean	S.E.M.	SD	Mean	S.E.M	SD	p value	Cohen's d
	<0.0001	F (1, 24) = 83.79		ZT0	2.76666	0.735225	1.64401	0	0	0	0.0395	-2.37994
Time	p value	F value		ZT1	3.4	0.863773	1.93146	0	0	0	0.0076	-2.48948
	0.0033	F (5, 24) = 4.853		ZT2	3.36666	0.412993	0.923481	0	0	0	0.0083	-5.15568
Condition x Time	p value	F value		ZT3	4.66665	0.630248	1.40928	0.733334	0.452156	1.01105	0.0018	-3.20711
	0.7897	F (5, 24) = 0.4771		ZT4	5.49999	0.329142	0.735984	1	0.333333	0.745355	0.0004	-6.07544
				ZT5	4.66667	1.11429	2.49163	1.73333	0.890692	1.99165	0.0259	-1.30051
H
Gonadectomized female mice				Gonadectomized female mice
Two-way ANOVA				Sidak test
Condition	p value	F value			Baseline			Cage change
	0.1283	F (1, 65) = 2.372		Delta density	Mean	S.E.M.	SD	Mean	S.E.M	SD
Time	p value	F value		ZT0	11.4743	0.544204	1.21688
	0.1209	F (18, 73) = 1.485		ZT1	10.5155	0.590958	1.32142
Condition x Time	p value	F value		ZT2	10.372	0.579295	1.29534
	0.009	F (18, 65) = 2.254		ZT3	9.64817	0.655565	1.46589
				ZT4	9.50229	0.502352	1.12329				p value	Cohen's d
				ZT5	9.55055	0.637967	1.42654	11.8758	0.769039	1.71962	0.0083	1.47181
				ZT6	9.25196	0.74764	1.67177	11.3068	0.789547	1.76548	0.0318	1.1952
				ZT7	8.88826	0.577572	1.29149	10.6274	0.580496	1.29803	0.1296	1.34323
				ZT8	8.51054	0.644898	1.44204	9.55925	0.770705	1.72335	0.8636	0.660011
				ZT9	8.43994	0.610685	1.36553	9.26541	0.763976	1.7083	0.983	0.533786
				ZT10	9.18151	1.45289	3.24877	8.62249	0.592231	1.32427	0.9999	-0.225342
				ZT11	8.246	0.600921	1.3437	8.06403	0.492105	1.10038	>0.9999	-0.148178
				ZT12	6.82568	0.901828	1.80366	7.05795	0.37359	0.835374	>0.9999	0.165252
				ZT13	7.90696	0.657087	1.46929	7.99687	0.731241	1.6351	>0.9999	0.057844
				ZT14	8.28855	0.666774	1.49095	8.30324	0.583781	1.30537	>0.9999	0.01048
				ZT15	9.19184	0.556402	1.24415	8.11102	2.07824	3.59961	0.9955	-0.401338
				ZT16	8.76008	0.729384	1.63095	8.98256	0.530402	1.18602	>0.9999	0.156025
				ZT17	9.16529	1.18368	2.64679	8.62879	0.794447	1.58889	>0.9999	-0.245777
				ZT18	8.9315	0.428103	0.957266	9.47849	1.18084	2.36168	>0.9999	0.303556
				ZT19	9.3419	0.542901	1.21396	9.50841	0.628943	1.40636	>0.9999	0.126749
				ZT20	9.37868	0.682927	1.52707	9.13276	0.785385	1.75617	>0.9999	-0.149437
				ZT21	8.73289	0.546869	1.22284	8.34978	0.674267	1.50771	>0.9999	-0.279097
				ZT22	8.78951	0.89036	1.78072	8.92566	0.699172	0.988779	>0.9999	0.094532
				ZT23	9.9143	0.470981	0.815763	7.79947	1.46031	2.06519	0.3829	-1.34693
I
Hormone-supplemented female mice				Hormone-supplemented female mice
After cage changes (ZT6-11,ZT12-17, ZT18-23)
Two-way ANOVA
Condition	p value	F value
	0.5751	F (1, 8) = 0.3415		No post-hoc test has done because two-way ANOVA was not significant for the interaction or condition. changing
Time	p value	F value
	<0.0001	F (2, 16) = 35.25
Condition x Time	p value	F value
	0.8934	F (2, 16) = 0.1135
Hormone-supplemented female mice				Hormone-supplemented female mice
During cage changes (ZT0-5)				Sidak test
Two-way ANOVA					Baseline			Cage change
Condition	p value	F value		Wake	Mean	S.E.M.	SD	Mean	S.E.M	SD	p value	Cohen's d
	<0.0001	F (1, 18) = 111.2		ZT0	25.0835	4.50533	9.01065	60	0	0	<0.0001	5.48011
Time	p value	F value		ZT1	20.9582	6.06344	12.1269	58.75	1.25	2.5	<0.0001	4.31643
	<0.0001	F (5, 18) = 26.64		ZT2	23.875	4.12108	8.24217	37.3334	2.30538	4.61077	0.0663	2.01531
Condition x Time	p value	F value		ZT3	16.542	3.15155	6.30311	29.5	3.32359	6.64717	0.0823	2.00049
	0.0011	F (5, 18) = 6.714		ZT4	11.6668	1.43043	2.86085	21.5	1.45616	2.91232	0.2841	3.4064
				ZT5	14.75	1.19693	2.39385	29.0833	3.13988	6.27976	0.045	3.01617
J
Hormone-supplemented female mice				Hormone-supplemented female mice
After cage changes (ZT6-11,ZT12-17, ZT18-23)
Two-way ANOVA
Condition	p value	F value
	0.6063	F (1, 8) = 0.2877		No post-hoc test has done because two-way ANOVA was not significant for the interaction or condition. changing
Time	p value	F value
	<0.0001	F (2, 16) = 33.86
Condition x Time	p value	F value
	0.8756	F (2, 16) = 0.1340
Hormone-supplemented female mice				Hormone-supplemented female mice
During cage changes (ZT0-5)				Sidak test
Two-way ANOVA					Baseline			Cage change
Condition	p value	F value		NREMS	Mean	S.E.M.	SD	Mean	S.E.M	SD	p value	Cohen's d
	<0.0001	F (1, 18) = 95.42		ZT0	31.4168	3.51538	7.03076	0	0	0	<0.0001	-6.31937
Time	p value	F value		ZT1	34.875	5.33011	10.6602	1.25	1.25	2.5	<0.0001	-4.34295
	<0.0001	F (5, 18) = 27.33		ZT2	31.4585	3.94892	7.89785	21.75	2.18317	4.36635	0.1948	-1.52141
Condition x Time	p value	F value		ZT3	37.9582	3.22617	6.45233	27.1667	2.43624	4.87248	0.12	-1.88755
	0.0003	F (5, 18) = 8.245		ZT4	40.4582	1.26068	2.52136	35.6666	1.24722	2.49444	0.8566	-1.91058
				ZT5	38.9168	0.538048	1.0761	27.0833	2.65055	5.3011	0.0732	-3.09379
K
Hormone-supplemented female mice				Hormone-supplemented female mice
After cage changes (ZT6-11,ZT12-17, ZT18-23)
Two-way ANOVA
Condition	p value	F value
	0.3671	F (1, 8) = 0.9137		No post-hoc test has done because two-way ANOVA was not significant for the interaction or condition. changing
Time	p value	F value
	<0.0001	F (2, 16) = 39.09
Condition x Time	p value	F value
	0.9558	F (2, 16) = 0.04537
Hormone-supplemented female mice				Hormone-supplemented female mice
During cage changes (ZT0-5)				Sidak test
Two-way ANOVA					Baseline			Cage change
Condition	p value	F value		REMS	Mean	S.E.M.	SD	Mean	S.E.M	SD	p value	Cohen's d
	<0.0001	F (1, 18) = 115.6		ZT0	3.50002	1.00691	2.01382	0	0	0	0.0022	-2.4579
Time	p value	F value		ZT1	4.16665	0.879289	1.75858	0	0	0	0.0004	-3.35074
	<0.0001	F (5, 18) = 11.87		ZT2	4.66667	0.413878	0.827757	0.91667	0.25	0.5	0.0011	-5.48402
Condition x Time	p value	F value		ZT3	5.5	0.340206	0.680411	3.33333	1.13855	2.2771	0.0846	-1.2893
	0.1723	F (5, 18) = 1.759		ZT4	7.875	0.275345	0.55069	2.83333	0.440959	0.881918	<0.0001	-6.85755
				ZT5	6.33333	0.67014	1.34028	3.83333	0.518187	1.03637	0.0352	-2.0868
L
Hormone-supplemented female mice				Hormone-supplemented female mice
Two-way ANOVA				Sidak test
Condition	p value	F value			Baseline			Cage change
	0.9529	F (1, 33) = 0.003545		Delta density	Mean	S.E.M.	SD	Mean	S.E.M	SD
Time	p value	F value		ZT0	13.1073	0.337812	0.675623
	0.9529	F (17, 49) = 2.651		ZT1	11.4756	0.172095	0.344189
Condition x Time	p value	F value		ZT2	11.2965	0.481323	0.962646
	0.068	F (17, 33) = 1.825		ZT3	10.5396	0.279061	0.558121
				ZT4	9.99881	0.234973	0.469946				p value	Cohen's d
				ZT5	9.30693	0.322114	0.644229	10.5425	0.730303	1.46061	0.9352	1.09457
				ZT6	8.79722	0.666743	1.33349	10.686	0.257457	0.514914	0.3955	1.86861
				ZT7	8.59374	0.59512	1.19024	9.34031	0.326558	0.653117	0.9997	0.777662
				ZT8	8.64899	0.602566	1.20513	8.77176	0.424573	0.849146	>0.9999	0.117772
				ZT9	8.29746	0.454727	0.909454	8.80856	0.499729	0.999459	>0.9999	0.534894
				ZT10	8.20762	0.526621	1.05324	8.40888	0.987036	1.97407	>0.9999	0.127207
				ZT11	7.75347	0.561244	1.12249	8.10441	0.335541	0.671081	>0.9999	0.379496
				ZT12	6.04687	0.706353	1.22344	5.04361	1.65339	2.33825	0.9961	-0.537639
				ZT13	6.8367	0.838997	1.45319	7.22073	0.921216	1.84243	>0.9999	0.23145
				ZT14	7.5416	0.877782	1.52036	9.02182	0.924084	1.60056	>0.9999	0.948271
				ZT15	6.34697	1.04664	1.81283	4.65314	0.916583	1.29624	0.9976	-1.07487
				ZT16	7.51133	1.92796	2.72654	8.33028	0	0	>0.9999	0.424776
				ZT17	6.91415	1.76976	3.06532	9.30033	0	0	0.9624	1.10089
				ZT18	10.185	1.29787	2.59574	8.82732	1.9017	2.68942	>0.9999	-0.513676
				ZT19	10.1288	0.770214	1.54043	6.93426	1.94004	3.88008	0.008	-1.08219
				ZT20	11.0835	1.22888	2.12848	10.0692	0.62931	1.25862	0.9925	-0.580094
				ZT21	9.74471	1.27197	2.54394	9.38349	0.823685	1.16487	>0.9999	-0.182574
				ZT22	11.2462	0.436235	0.87247
				ZT23	10.7914	1.01109	2.02217	10.5658	0	0	>0.9999	-0.157791
M
Female mice				Female mice
Two-way ANOVA				Sidak test
Condition	p value	F value			Intact			Gonadectomy			Estradiol
	0.9045	F (2, 52) = 0.1006		Wake	Mean	S.E.M.	SD	Mean	S.E.M	SD	Mean	S.E.M	SD
Time	p value	F value		ZT0~5	2.67143	0.132223	0.34983	2.32074	0.183143	0.40952	2.15	0.232737	0.465475
	<0.0001	F (3, 52) = 142.3		ZT6~11	0.8	0.0308607	0.0816497	1.07414	0.0370909	0.0829378	0.975	0.0853913	0.170783
Condition x Time	p value	F value		ZT12~17	0.957143	0.0297381	0.0786796	0.957971	0.0797534	0.178334	1	0.0408248	0.0816497
	0.0048	F (6, 52) = 3.587		ZT18~23	0.914286	0.0769309	0.20354	1.03275	0.0378827	0.0847082	1.125	0.0629153	0.125831
				p value	0~6	6~12	12~18	18~24		Cohen's d	0~6	6~12	12~18	18~24
				Intact vs. Gonadectomy	0.0305	0.1111	>0.9999	0.6523		Intact vs. Gonadectomy	-0.920813	3.33115	0.00600698	0.759931
				Intact vs. Estradiol	0.0018	0.4463	0.952	0.3135		Intact vs. Estradiol	-1.26642	1.3074	0.534522	1.24531
				Gonadectomy vs. Estradiol	0.5105	0.7953	0.9595	0.82		Gonadectomy vs. Estradiol	-0.389471	-0.738491	0.303045	0.86005
N
Female mice				Female mice
Two-way ANOVA				Sidak or Kruskal Wallis test (only for ZT12-18)
Condition	p value	F value			Intact			Gonadectomy			Estradiol
	0.1685	F (2, 39) = 1.865		NREMS	Mean	S.E.M.	SD	Mean	S.E.M	SD	Mean	S.E.M	SD
Time	p value	F value		ZT0~5	0.214286	0.0142857	0.0377964	0.379356	0.0489282	0.109407	0.525	0.0478714	0.0957427
	<0.0001	F (2, 39) = 25.92		ZT6~11	1.14286	0.0297381	0.0786796	0.930337	0.0200868	0.0449155	1.025	0.0478714	0.0957427
Condition x Time	p value	F value		ZT12~17	3.72857	2.16462	5.72705	1.27616	0.272999	0.610444	0.866667	0.133333	0.23094
	0.0068	F (4, 39) = 4.146		ZT18~23	1.35714	0.246748	0.652833	0.91804	0.0492284	0.110078	0.7	0.173205	0.34641
				p value	ZT0~6	ZT6~12	ZT12~18	ZT18~24		Cohen's d	ZT0~6	ZT6~12	ZT12~18	ZT18~24
				Intact vs. Gonadectomy	0.5835	0.4132	>0.9999	0.0304		Intact vs. Gonadectomy	2.01677	-3.31742	-0.602178	-0.937976
				Intact vs. Estradiol	0.1992	0.7853	0.289	0.0019		Intact vs. Estradiol	4.26895	-1.34498	-0.706133	-1.25748
				Gonadectomy vs. Estradiol	0.725	0.8723	0.6992	0.4905		Gonadectomy vs. Estradiol	1.41674	1.26589	-0.887297	-0.848344
O
Female mice				Female mice
Two-way ANOVA				Sidak or Kruskal Wallis test (only for ZT12-18)
Condition	p value	F value			Intact			Gonadectomy			Estradiol
	0.1404	F (2, 39) = 2.065		REMS	Mean	S.E.M.	SD	Mean	S.E.M	SD	Mean	S.E.M	SD
Time	p value	F value		ZT0~5	0.0714286	0.0184428	0.048795	0.152	0.0436348	0.0975705	0.325	0.0629153	0.125831
	<0.0001	F (2, 39) = 67.25		ZT6~11	1.27143	0.0808122	0.213809	1.164	0.0386782	0.086487	1.025	0.0629153	0.125831
Condition x Time	p value	F value		ZT12~17	2.16667	1.10141	2.6979	1.85158	0.61274	1.37013	1.13333	0.290593	0.503322
	0.0227	F (4, 39) = 3.210		ZT18~23	1.38571	0.201694	0.533631	1.03784	0.066571	0.148857	0.85	0.170783	0.341565
				p value	ZT0~6	ZT6~12	ZT12~18	ZT18~24		Cohen's d	ZT0~6	ZT6~12	ZT12~18	ZT18~24
				Intact vs. Gonadectomy	0.8556	0.7586	0.955	0.0674		Intact vs. Gonadectomy	1.04449	-0.658722	-0.147264	-0.888029
				Intact vs. Estradiol	0.2717	0.2914	>0.9999	0.0056		Intact vs. Estradiol	2.65711	-1.40475	-0.532476	-1.19576
				Gonadectomy vs. Estradiol	0.5819	0.7036	>0.9999	0.5291		Gonadectomy vs. Estradiol	1.53654	-1.28744	-0.695887	-0.712958
P
Female mice				Female mice
Cage change				Sidak test
Two-way ANOVA					Basal			Cage change
Condition	p value	F value		Wake(2hr)	Mean	S.E.M.	SD	Mean	S.E.M	SD	p value	Cohen's d
	<0.0001	F (1, 13) = 47.91		Intact	14.4762	2.46307	6.51667	39.881	1.19562	3.16332	<0.0001	4.95975
Hormonal status	p value	F value		Gonadectomy	20.1	3.07865	6.88406	30.9333	3.27855	7.33106	0.0565	1.52345
	0.0047	F (2, 13) = 8.305		Estradiol	13.2083	1.22734	2.45468	25.2917	2.14883	4.29766	0.0572	3.45271
Condition x Hormonal status	p value	F value
	0.0287	F (2, 13) = 4.725
Female mice, Cage change				Female mice, Cage change
One-way ANOVA				Sidak test
Hormonal status	p value	F value		Intact			Gonadectomy			Estradiol
	0.0023	F (2, 12) = 10.55		Mean	S.E.M.	SD	Mean	S.E.M	SD	Mean	S.E.M	SD
				39.881	1.19562	3.16332	30.9333	3.27855	7.33106	25.2917	2.14883	4.29766
					Intact vs. Gonadectomy	Intact vs. Estradiol	Gonadectomy vs. Estradiol
				p value	0.0714	0.0023	0.3113
				Cohen's d	-1.58482	-3.86639	-0.938881

## Sheet: Fig.S2
Statistical summary of Supplementary Figure 2
A
Intact mice				Intact mice
Two-way ANOVA				Sidak test
Sex	p value	F value			Male			Female
	0.0113	F (1, 69) = 6.772		Wake	Mean	S.E.M.	SD	Mean	S.E.M	SD	p value	Cohen's d
Time	p value	F value		24hr	161.12	5.78238	19.178	139.958	10.5134	39.3374	0.0846	-0.683829
	<0.0001	F (2, 69) = 131.8		Light	109.384	4.21789	13.9892	107.319	6.45471	24.1513	0.995	-0.104593
Sex x Time	p value	F value		Dark	52.2006	2.85114	9.45615	32.6425	4.72767	17.6893	0.1239	-1.37895
	0.2942	F (2, 69) = 1.245
B
Intact mice				Intact mice
Two-way ANOVA				Sidak test
Sex	p value	F value			Male			Female
	0.0142	F (1, 69) = 6.326		NREMS	Mean	S.E.M.	SD	Mean	S.E.M	SD	p value	Cohen's d
Time	p value	F value		24hr	160.73	5.84721	19.393	139.989	10.5581	39.5048	0.0957	-0.666525
	<0.0001	F (2, 69) = 130.9		Light	108.749	4.31144	14.2994	106.904	6.38586	23.8937	0.9964	-0.0937153
Sex x Time	p value	F value		Dark	51.5807	2.9146	9.66663	32.6411	4.78579	17.9068	0.1451	-1.31624
	0.3083	F (2, 69) = 1.197
C
Intact mice				Intact mice
Two-way ANOVA				Sidak test
Sex	p value	F value			Male			Female
	<0.0001	F (1, 69) = 32.00		REMS	Mean	S.E.M.	SD	Mean	S.E.M	SD	p value	Cohen's d
Time	p value	F value		24hr	58.9962	1.70959	5.67006	49.8088	1.56884	5.87004	<0.0001	-1.59202
	<0.0001	F (2, 69) = 546.3		Light	44.4343	1.5928	5.28273	40.0662	0.749913	2.80592	0.0652	-1.03273
Sex x Time	p value	F value		Dark	14.3954	1.14036	3.78216	9.6565	1.01656	3.80362	0.0397	-1.24943
	0.1349	F (2, 69) = 2.063
D
Male mice				Male mice
Two-way ANOVA				Sidak test
Condition	p value	F value			Intact			Gonadectomy			Testosterone
	<0.0001	F (2, 114) = 11.59		Wake	Mean	S.E.M.	SD	Mean	S.E.M	SD	Mean	S.E.M	SD
Time	p value	F value		24hr	161.12	5.78238	19.178	187.919	5.94878	23.7951	164.755	8.00159	29.9392
	<0.0001	F (2, 114) = 344.2		Light	109.384	4.21789	13.9892	116.157	3.12075	12.483	101.751	3.65219	13.6653
Condition x TIME	p value	F value		Dark	52.2006	2.85114	9.45615	71.9687	3.21839	12.8735	63.2813	5.52555	20.6747
	0.1953	F (4, 114) = 1.540
				p value	24hr	Light	Dark		Cohen's d	24hr	Light	Dark
				Intact vs. Gonadectomy	0.0011	0.7313	0.023		Intact vs. Gonadectomy	1.24011	0.510936	1.75019
				Intact vs. Testosterone	0.9488	0.6728	0.3689		Intact vs. Testosterone	0.144587	-0.551939	0.689277
				Gonadectomy vs. Testosterone	0.0028	0.1058	0.497		Gonadectomy vs. Testosterone	-0.856587	-1.10075	-0.504446
E
Male mice
Two-way ANOVA				Male mice
Condition	p value	F value		Sidak test
	<0.0001	F (2, 114) = 12.13			Intact			Gonadectomy			Testosterone
Time	p value	F value		NREMS	Mean	S.E.M.		Mean	S.E.M		Mean	S.E.M
	<0.0001	F (2, 114) = 345.8		24hr	160.73	5.84721	19.393	188.188	5.91438	23.6575	164.774	7.99293	29.9068
Condition x TIME	p value	F value		light	108.749	4.31144	14.2994	115.993	3.12093	12.4837	101.128	3.71425	13.8974
	0.1757	F (4, 114) = 1.613		dark	51.5807	2.9146	9.66663	71.8851	3.19008	12.7603	63.3932	5.44436	20.3709
				p value	24hr	Light	Dark		Cohen's d	24hr	Light	Dark
				Intact vs. Gonadectomy	0.0008	0.6887	0.0186		Intact vs. Gonadectomy	1.26939	0.539678	1.79373
				Intact vs. Testosterone	0.9313	0.6735	0.3134		Intact vs. Testosterone	0.160457	-0.540467	0.740877
				Gonadectomy vs. Testosterone	0.0024	0.0903	0.5159		Gonadectomy vs. Testosterone	-0.868329	-1.12527	-0.499612
F
Male mice
Two-way ANOVA
Condition	p value	F value		Male mice
	<0.0001	F (2, 114) = 57.64		Sidak test
Time	p value	F value			Intact			Gonadectomy			Testosterone
	<0.0001	F (2, 114) = 684.4		REMS	Mean	S.E.M.	SD	Mean	S.E.M	SD	Mean	S.E.M	SD
Condition x TIME	p value	F value		24hr	58.9962	1.70959	5.67006	72.8918	1.98305	7.93219	55.714	1.3186	4.93377
	<0.0001	F (4, 114) = 7.234		Light	44.4343	1.5928	5.28273	45.9668	1.43385	5.73539	40.7647	1.15518	4.32228
				Dark	14.3954	1.14036	3.78216	26.6497	1.01389	4.05556	14.9148	1.15904	4.33674
				p value	24hr	Light	Dark		Cohen's d	24hr	Light	Dark
				Intact vs. Gonadectomy	<0.0001	0.8459	<0.0001		Intact vs. Gonadectomy	2.01546	0.277944	3.12509
				Intact vs. Testosterone	0.3387	0.2461	0.993		Intact vs. Testosterone	-0.617565	-0.760317	0.127643
G				Gonadectomy vs. Testosterone	<0.0001	0.0259	<0.0001		Gonadectomy vs. Testosterone	-2.60059	-1.0244	-2.79501
Female mice
Two-way ANOVA
Condition	p value	F value
	<0.0001	F (2, 108) = 22.97		Female mice
Time	p value	F value		Sidak test
	<0.0001	F (2, 108) = 192.7			Intact			Gonadectomy			Estradiol
Condition x TIME	p value	F value		Wake	Mean	S.E.M.	SD	Mean	S.E.M	SD	Mean	S.E.M	SD
	0.081	F (4, 108) = 2.138		24hr	139.958	10.5134	39.3374	176.331	6.82172	25.5246	122.635	9.3721	31.0837
				Light	107.319	6.45471	24.1513	114.364	4.70398	17.6007	93.4401	5.56065	18.4426
				Dark	32.6425	4.72767	17.6893	61.7354	2.90661	10.8756	27.9544	4.44907	14.7559
				p value	24hr	Light	Dark		Cohen's d	24hr	Light	Dark
				Intact vs. Gonadectomy	0.0009	0.9941	0.0143		Intact vs. Gonadectomy	1.09692	0.333399	1.98138
H				Intact vs. Estradiol	0.496	0.769	0.9999		Intact vs. Estradiol	-0.488656	-0.645924	-0.287812
Female mice				Gonadectomy vs. Estradiol	<0.0001	0.2474	0.0056		Gonadectomy vs. Estradiol	-1.88801	-1.16076	-2.6062
Two-way ANOVA
Condition	p value	F value
	<0.0001	F (2, 108) = 22.54
Time	p value	F value		Female mice
	<0.0001	F (2, 108) = 190.8		Sidak test
Condition x TIME	p value	F value			Intact			Gonadectomy			Estradiol
	0.0822	F (4, 108) = 2.129		NREMS	Mean	S.E.M.	SD	Mean	S.E.M	SD	Mean	S.E.M	SD
				24hr	139.989	10.5581	39.5048	175.975	6.8529	25.6412	122.508	9.34365	30.9894
				Light	106.904	6.38586	23.8937	113.813	4.75472	17.7905	92.7853	5.5582	18.4345
				Dark	32.6411	4.78579	17.9068	61.6039	2.89656	10.8379	28.5812	4.38231	14.5345
				p value	24hr	Light	Dark		Cohen's d	24hr	Light	Dark
I				Intact vs. Gonadectomy	0.0003	0.8282	0.0051		Intact vs. Gonadectomy	1.0806	0.328012	1.95687
Female mice				Intact vs. Estradiol	0.1985	0.3725	0.965		Intact vs. Estradiol	-0.492362	-0.661616	-0.24895
Two-way ANOVA				Gonadectomy vs. Estradiol	<0.0001	0.0887	0.0025		Gonadectomy vs. Estradiol	-1.87991	-1.16077	-2.57585
Condition	p value	F value
	<0.0001	F (2, 108) = 25.04
Time	p value	F value
	<0.0001	F (2, 108) = 496.0		Female mice
Condition x TIME	p value	F value		Sidak test
	0.0135	F (4, 108) = 3.303			Intact			Gonadectomy			Estradiol
				REMS	Mean	S.E.M.	SD	Mean	S.E.M	SD	Mean	S.E.M	SD
				24hr	49.8088	1.56884	5.87004	64.1093	2.84225	10.6347	55.512	2.39368	7.93894
				Light	40.0662	0.749913	2.80592	44.9597	1.92717	7.21081	45.3696	1.26082	4.18168
				Dark	9.6565	1.01656	3.80362	19.1241	1.25327	4.6893	10.1616	1.35661	4.49938
J				p value	24hr	Light	Dark		Cohen's d	24hr	Light	Dark
Gonadectomized mice				Intact vs. Gonadectomy	<0.0001	0.1146	0.0003		Intact vs. Gonadectomy	1.6649	0.894405	2.2175
Two-way ANOVA				Intact vs. Estradiol	0.0727	0.1059	0.996		Intact vs. Estradiol	0.816899	1.48935	0.121239
Sex	p value	F value		Gonadectomy vs. Estradiol	0.0026	0.9978	0.0016		Gonadectomy vs. Estradiol	-0.916148	0.0695427	-1.95035
	0.042	F (1, 84) = 4.263
Time	p value	F value
	<0.0001	F (2, 84) = 307.3
Sex x Time	p value	F value		Gonadectomized mice
	0.5267	F (2, 84) = 0.6460		Sidak test
					Male			Female
				Wake	Mean	S.E.M.	SD	Mean	S.E.M	SD	p value	Cohen's d
K				24hr	187.919	5.94878	23.7951	176.331	6.82172	25.5246	0.2287	-0.469639
Gonadectomized mice				Light	116.157	3.12075	12.483	114.364	4.70398	17.6007	0.9903	-0.117497
Two-way ANOVA				Dark	71.9687	3.21839	12.8735	61.7354	2.90661	10.8756	0.33	-0.858747
Sex	p value	F value
	0.0339	F (1, 84) = 4.651
Time	p value	F value
	<0.0001	F (2, 84) = 307.7
Sex x Time	p value	F value		Gonadectomized mice
	0.5249	F (2, 84) = 0.6495		Sidak test
					Male			Female
				NREMS	Mean	S.E.M.	SD	Mean	S.E.M	SD	p value	Cohen's d
L				24hr	188.188	5.91438	23.6575	175.975	6.8529	25.6412	0.1904	-0.495041
Gonadectomized mice				Light	115.993	3.12093	12.4837	113.813	4.75472	17.7905	0.9829	-0.141829
Two-way ANOVA				Dark	71.8851	3.19008	12.7603	61.6039	2.89656	10.8379	0.3263	-0.868476
Sex	p value	F value
	0.0002	F (1, 84) = 15.23
Time	p value	F value
	<0.0001	F (2, 84) = 317.1
Sex x Time	p value	F value		Gonadectomized mice
	0.0762	F (2, 84) = 2.655		Sidak test
					Male			Female
				REMS	Mean	S.E.M.	SD	Mean	S.E.M	SD	p value	Cohen's d
M				24hr	72.8918	1.98305	7.93219	64.1093	2.84225	10.6347	0.0028	-0.93618
Hormone supplemented mice				Light	45.9668	1.43385	5.73539	44.9597	1.92717	7.21081	0.9717	-0.154583
Two-way ANOVA	Sex x Time			Dark	26.6497	1.01389	4.05556	19.1241	1.25327	4.6893	0.0127	-1.71665
Sex	p value	F value
	<0.0001	F (1, 69) = 29.88
Time	p value	F value
	<0.0001	F (2, 69) = 117.4
Sex x Time	p value	F value		Hormone supplemented mice
	0.0249	F (2, 69) = 3.898		Sidak test
					Male			Female
				Wake	Mean	S.E.M.	SD	Mean	S.E.M	SD	p value	Cohen's d
N				24hr	164.755	29.9392	29.9392	122.635	31.0837	31.0837	<0.0001	-1.38022
Hormone supplemented mice				Light	101.751	13.6653	13.6653	93.4401	18.4426	18.4426	0.7404	-0.512064
Two-way ANOVA				Dark	63.2813	20.6747	20.6747	27.9544	14.7559	14.7559	0.0007	-1.96689
Sex	p value	F value
	<0.0001	F (1, 69) = 29.84
Time	p value	F value
	<0.0001	F (2, 69) = 117.1
Sex x Time	p value	F value		Hormone supplemented mice
	0.0249	F (2, 69) = 3.899		Sidak test
					Male			Female
				NREMS	Mean	S.E.M.	SD	Mean	S.E.M	SD	p value	Cohen's d
O				24hr	164.774	29.9068	29.9068	122.508	30.9894	30.9894	<0.0001	-1.38791
Hormone supplemented mice				Light	101.128	13.8974	13.8974	92.7853	18.4345	18.4345	0.7362	-0.51109
Two-way ANOVA				Dark	63.3932	20.3709	20.3709	28.5812	14.5345	14.5345	0.0008	-1.96734
Sex	p value	F value
	0.9222	F (1, 69) = 0.009599
Time	p value	F value
	<0.0001	F (2, 69) = 460.7
Sex x Time	p value	F value		Hormone supplemented mice
	0.0083	F (2, 69) = 5.139		Sidak test
					Male			Female
				REMS	Mean	S.E.M.	SD	Mean	S.E.M	SD	p value	Cohen's d
				24hr	55.714	4.93377	4.93377	55.512	7.93894	7.93894	0.9995	-0.0305641
				Light	40.7647	4.32228	4.32228	45.3696	4.18168	4.18168	0.0844	1.08286
				Dark	14.9148	4.33674	4.33674	10.1616	4.49938	4.49938	0.0712	-1.07568
