# Supplementary material for: The Role of Reproductive Hormones in Sex Differences in Sleep Homeostasis and Arousal Response in Mice
Source: Front Neurosci. 2021 Sep 21;15:739236. doi: 10.3389/fnins.2021.739236 (PMC8491770; doi:10.3389/fnins.2021.739236)
Supplement: Supplementary file 4 [file Table_2.XLSX]

## Sheet: Time of day
Supplementary Table 2
Time of day comparison (6-hr range) between male and female
Average of total time in each state (in minute) and S.E.M. for 4 x 6hr period (ZT0~6, ZT7~11, ZT12~17, ZT18~23) are indicated. Significant P values (.<0.05) are shown in bold.
Wake
Intact mice				Intact mice
Two-way ANOVA				Sidak test
Sex	p value	F value			Male			Female
	<0.0001	F (1, 92) = 30.39			Mean	SEM	SD	Mean	SEM	SD	p value	Cohen's d
Time	p value	F value		0~6	115.621	4.06004	13.4656	128.036	4.51315	16.8866	0.5049	0.812881
	<0.0001	F (3, 92) = 398.8		7~11	132.47	4.09566	13.5838	153.036	4.40751	16.4914	0.0831	1.36129
Sex x Time	p value	F value		12~17	291.764	8.80012	29.1867	327.071	8.24234	30.84	0.0005	1.17596
	0.2884	F (3, 92) = 1.273		18~23	228.315	5.90112	19.5718	256.929	6.69777	25.0608	0.0063	1.27259
Gonadectomized mice				Gonadectomized mice
Two-way ANOVA				Sidak test
Sex	p value	F value			Male			Female
	<0.0001	F (1, 112) = 18.97			Mean	SEM	SD	Mean	SEM	SD	p value	Cohen's d
Time	p value	F value		0~6	117.323	4.05778	16.2311	123.143	4.079	15.2622	0.9087	0.369423
	<0.0001	F (3, 112) = 205.4		7~11	131.729	3.51485	14.0594	125.164	3.14934	11.7838	0.8657	-0.506098
Sex x Time	p value	F value		12~17	210.375	5.39091	21.5636	248.031	7.84836	29.3659	<0.0001	1.4617
	0.0002	F (3, 112) = 7.206		18~23	192.281	6.74799	26.992	222.302	6.83491	25.5739	0.0006	1.14181
Hormone supplemented mice				Hormone supplemented mice
Two-way ANOVA				Sidak test
Sex	p value	F value			Male			Female
	<0.0001	F (1, 92) = 72.07			Mean	SEM	SD	Mean	SEM	SD	p value	Cohen's d
Time	p value	F value		0~6	111.526	4.46153	16.6935	117.667	5.03829	16.7101	0.95	0.367653
	<0.0001	F (3, 92) = 322.0		7~11	120.612	2.58214	9.6615	145.288	4.48984	14.8911	0.0487	1.96595
Sex x Time	p value	F value		12~17	261.933	10.407	38.9394	322.045	8.2139	27.2424	<0.0001	1.78885
	<0.0001	F (3, 92) = 10.30		18~23	212.148	5.99268	22.4226	285.485	9.30663	30.8666	<0.0001	2.71851
NREMS
Intact mice				Intact mice
Two-way ANOVA				Sidak test
Sex	p value	F value			Male			Female
	<0.0001	F (1, 92) = 36.07		Intact	Mean	SEM	SD	Mean	SEM	SD	p value	Cohen's d
Time	p value	F value		0~6	212.667	3.58363	11.8856	200.75	4.05404	15.1688	0.4447	-0.874525
	<0.0001	F (3, 92) = 351.0		7~11	199.061	3.5809	11.8765	177.845	4.06358	15.2045	0.0352	-1.55511
Sex x Time	p value	F value		12~17	64.1364	8.2482	27.3562	29.7381	7.44118	27.8423	0.0002	-1.2463
	0.2301	F (3, 92) = 1.462		18~23	119.688	5.11877	16.977	91.8571	5.9558	22.2846	0.0028	-1.40493
Gonadectomized mice				Gonadectomized mice
Two-way ANOVA				Sidak test
Sex	p value	F value			Male			Female
	<0.0001	F (1, 112) = 19.84		Gona.	Mean	SEM	SD	Mean	SEM	SD	p value	Cohen's d
Time	p value	F value		0~6	218.063	3.27455	13.0982	212.25	3.21083	12.0138	0.8557	-0.462495
	<0.0001	F (3, 112) = 205.2		7~11	200.452	2.86182	11.4473	205.726	2.91137	10.8933	0.8938	0.472009
Sex x Time	p value	F value		12~17	136.581	4.63449	18.5379	103.202	7.14513	26.7346	<0.0001	-1.45098
	0.0002	F (3, 112) = 7.085		18~23	148.542	5.53591	22.1437	123.25	6.28276	23.5079	0.0009	-1.10754
Hormone supplemented mice				Hormone supplemented mice
Two-way ANOVA				Sidak test
Sex	p value	F value			Male			Female
	<0.0001	F (1, 92) = 88.93		Hormone	Mean	SEM	SD	Mean	SEM	SD	p value	Cohen's d
Time	p value	F value		0~6	217.093	3.81997	14.293	207.818	5.05537	16.7668	0.7673	-0.595329
	<0.0001	F (3, 92) = 256.8		7~11	210.238	2.64408	9.89322	179.333	4.41794	14.6526	0.0036	-2.47208
Sex x Time	p value	F value		12~17	92.431	9.76838	36.5499	33.6212	7.4191	24.6064	<0.0001	-1.8876
	<0.0001	F (3, 92) = 9.475		18~23	137.14	5.64688	21.1287	66.3939	8.415	27.9094	<0.0001	-2.85818
REM
Intact mice				Intact mice
Two-way ANOVA				Sidak test
Sex	p value	F value
	0.573	F (1, 92) = 0.3200
Time	p value	F value		No post-hoc test has done because two-way ANOVA was not significant for either the interation or sex
	<0.0001	F (3, 92) = 399.3
Sex x Time	p value	F value
	0.8397	F (3, 92) = 0.2801
Gonadectomized mice				Gonadectomized mice
Two-way ANOVA				Sidak test
Sex	p value	F value			Male			Female
	0.0157	F (1, 112) = 6.021		Gona.	Mean	SEM	SD	Mean	SEM	SD	p value	Cohen's d
Time	p value	F value		0~6	24.6146	1.11925	4.47699	24.6071	1.34956	5.04959	>0.9999	-0.00155923
	<0.0001	F (3, 112) = 99.81		7~11	27.8104	1.22278	4.89111	29.1071	0.797892	2.98544	0.8803	0.320029
Sex x Time	p value	F value		12~17	13.0479	0.898373	3.59349	8.7619	0.904424	3.38405	0.0297	-1.22796
	0.0139	F (3, 112) = 3.698		18~23	19.1812	1.40745	5.62981	14.4524	0.900317	3.36868	0.0131	-1.01935
Hormone supplemented mice				Hormone supplemented mice
Two-way ANOVA				Sidak test
Sex	p value	F value			Male			Female
	0.067	F (1, 92) = 3.436		Hormone	Mean	SEM	SD	Mean	SEM	SD	p value	Cohen's d
Time	p value	F value		0~6	31.381	1.09157	4.08428	34.5152	1.42709	4.73313	0.1373	0.708995
	<0.0001	F (3, 92) = 401.9		7~11	29.1548	0.71664	2.68142	35.3788	1.31081	4.34747	0.0002	1.72324
Sex x Time	p value	F value		12~17	5.64286	0.794298	2.97199	4.33333	0.884776	2.93447	0.8492	-0.443412
	0.0001	F (3, 92) = 7.581		18~23	10.7024	0.990057	3.70445	8.12121	1.08667	3.60408	0.2942	-0.706277
